# Supplementary material for: Practical biomarkers and robust multiplex models for the prediction of response to promising first-line chemotherapy: A theranostic study in metastatic ovarian cancer patients with residual peritoneal tumors
Source: Research Square preprint supplement (doi:10.21203/rs.3.rs-2465306/v1), 2023-01-12
Supplement: Supplementary file 1 [file 00939bf79f65f88c9e6940ff.xlsx]

## Sheet: Sheet0
Supplementary Table_S4. Functional enrichment analyses on 61 selected genes
Categories	Diseases or Functions Annotation	P-Value	Molecules	# Molecules
Cancer, Organismal Injury and Abnormalities	Carcinoma	1.49e-15	ABCC2,ALAS2,AMBP,AQP7,CACNA1I,CASP2,CCNH,CIDEA,CPN1,CUL1,DUOX2,F2,FGB,FGFR2,GCKR,GJA3,GLP2R,GPD1,HYAL1,INSL3,KRIT1,KRT24,LIPE,LUC7L2,MKRN1,MSH6,NHLH1,NXT2,PAX7,PAXIP1,PDE3A,PF4V1,PGLYRP1,PIK3R5,PPP1R9A,PRODH2,PTPRF,PUF60,RAB5C,RALBP1,RND1,RNF38,SERPINA4,SERPINA6,SERPINF2,SLC1A3,SLC27A6,SLC5A1,SSPN,TBP,TF,TMPRSS3,TNNT3,TNPO3,UBE3C,USH1C,VANGL1,VAT1,VTCN1,ZNF16	60
Cancer, Gastrointestinal Disease, Organismal Injury and Abnormalities	Gastrointestinal adenocarcinoma	4.56e-15	ABCC2,ALAS2,AMBP,AQP7,CACNA1I,CASP2,CCNH,CIDEA,CPN1,CUL1,DUOX2,F2,FGB,FGFR2,GCKR,GJA3,GLP2R,GPD1,INSL3,KRIT1,LIPE,LUC7L2,MSH6,NXT2,PAX7,PAXIP1,PDE3A,PF4V1,PGLYRP1,PIK3R5,PPP1R9A,PRODH2,PTPRF,PUF60,RALBP1,RND1,RNF38,SERPINA4,SERPINA6,SERPINF2,SLC1A3,SLC27A6,SLC5A1,SSPN,TBP,TF,TMPRSS3,TNNT3,TNPO3,UBE3C,USH1C,VAT1,VTCN1,ZNF16	54
Cancer, Organismal Injury and Abnormalities	Nonhematologic malignant neoplasm	1.05e-14	ABCC2,ALAS2,AMBP,AQP7,CACNA1I,CASP2,CCNH,CIDEA,CPN1,CUL1,DUOX2,DUSP13,F2,FGB,FGFR2,GCKR,GJA3,GLP2R,GPD1,HYAL1,INSL3,KRIT1,KRT24,LIPE,LUC7L2,MKRN1,MSH6,NHLH1,NXT2,PAX7,PAXIP1,PDE3A,PF4V1,PGLYRP1,PIK3R5,PPP1R9A,PRODH2,PTPRF,PUF60,RAB5C,RALBP1,RND1,RNF38,SERPINA4,SERPINA6,SERPINF2,SLC1A3,SLC27A6,SLC5A1,SSPN,TBP,TF,TMPRSS3,TNNT3,TNPO3,UBE3C,USH1C,VANGL1,VAT1,VTCN1,ZNF16	61
Cancer, Organismal Injury and Abnormalities	Abdominal neoplasm	1.44e-14	ABCC2,ALAS2,AMBP,AQP7,CACNA1I,CASP2,CCNH,CIDEA,CPN1,CUL1,DUOX2,DUSP13,F2,FGB,FGFR2,GCKR,GJA3,GLP2R,GPD1,HYAL1,INSL3,KRIT1,KRT24,LIPE,LUC7L2,MKRN1,MSH6,NHLH1,NXT2,PAX7,PAXIP1,PDE3A,PF4V1,PGLYRP1,PIK3R5,PPP1R9A,PRODH2,PTPRF,PUF60,RAB5C,RALBP1,RND1,RNF38,SERPINA4,SERPINA6,SERPINF2,SLC1A3,SLC27A6,SLC5A1,SSPN,TBP,TF,TMPRSS3,TNNT3,TNPO3,UBE3C,USH1C,VAT1,VTCN1,ZNF16	60
Cancer, Organismal Injury and Abnormalities	Adenocarcinoma	1.48e-14	ABCC2,ALAS2,AMBP,AQP7,CACNA1I,CASP2,CCNH,CIDEA,CPN1,CUL1,DUOX2,F2,FGB,FGFR2,GCKR,GJA3,GLP2R,GPD1,INSL3,KRIT1,KRT24,LIPE,LUC7L2,MKRN1,MSH6,NHLH1,NXT2,PAX7,PAXIP1,PDE3A,PF4V1,PGLYRP1,PIK3R5,PPP1R9A,PRODH2,PTPRF,PUF60,RALBP1,RND1,RNF38,SERPINA4,SERPINA6,SERPINF2,SLC1A3,SLC27A6,SLC5A1,SSPN,TBP,TF,TMPRSS3,TNNT3,TNPO3,UBE3C,USH1C,VAT1,VTCN1,ZNF16	57
Cancer, Organismal Injury and Abnormalities	Extracranial solid tumor	3.94e-14	ABCC2,ALAS2,AMBP,AQP7,CACNA1I,CASP2,CCNH,CIDEA,CPN1,CUL1,DUOX2,DUSP13,F2,FGB,FGFR2,GCKR,GJA3,GLP2R,GPD1,HYAL1,INSL3,KRIT1,KRT24,LIPE,LUC7L2,MKRN1,MSH6,NHLH1,NXT2,PAX7,PAXIP1,PDE3A,PF4V1,PGLYRP1,PIK3R5,PPP1R9A,PRODH2,PTPRF,PUF60,RAB5C,RALBP1,RND1,RNF38,SERPINA4,SERPINA6,SERPINF2,SLC1A3,SLC27A6,SLC5A1,SSPN,TBP,TF,TMPRSS3,TNNT3,TNPO3,UBE3C,USH1C,VANGL1,VAT1,VTCN1,ZNF16	61
Cancer, Gastrointestinal Disease, Organismal Injury and Abnormalities	Gastrointestinal neoplasia	9.08e-14	ABCC2,ALAS2,AMBP,AQP7,CACNA1I,CASP2,CCNH,CIDEA,CPN1,CUL1,DUOX2,F2,FGB,FGFR2,GCKR,GJA3,GLP2R,GPD1,HYAL1,INSL3,KRIT1,LIPE,LUC7L2,MSH6,NXT2,PAX7,PAXIP1,PDE3A,PF4V1,PGLYRP1,PIK3R5,PPP1R9A,PRODH2,PTPRF,PUF60,RALBP1,RND1,RNF38,SERPINA4,SERPINA6,SERPINF2,SLC1A3,SLC27A6,SLC5A1,SSPN,TBP,TF,TMPRSS3,TNNT3,TNPO3,UBE3C,USH1C,VAT1,VTCN1,ZNF16	55
Cancer, Gastrointestinal Disease, Organismal Injury and Abnormalities	Digestive organ tumor	3.28e-13	ABCC2,ALAS2,AMBP,AQP7,CACNA1I,CASP2,CCNH,CIDEA,CPN1,CUL1,DUOX2,DUSP13,F2,FGB,FGFR2,GCKR,GJA3,GLP2R,GPD1,HYAL1,INSL3,KRIT1,KRT24,LIPE,LUC7L2,MSH6,NXT2,PAX7,PAXIP1,PDE3A,PF4V1,PGLYRP1,PIK3R5,PPP1R9A,PRODH2,PTPRF,PUF60,RAB5C,RALBP1,RND1,RNF38,SERPINA4,SERPINA6,SERPINF2,SLC1A3,SLC27A6,SLC5A1,SSPN,TBP,TF,TMPRSS3,TNNT3,TNPO3,UBE3C,USH1C,VAT1,VTCN1,ZNF16	58
Cancer, Organismal Injury and Abnormalities	Melanoma	3.99e-12	ABCC2,ALAS2,AMBP,CACNA1I,CPN1,CUL1,DUOX2,DUSP13,F2,FGB,FGFR2,GCKR,GJA3,GLP2R,GPD1,HYAL1,INSL3,KRIT1,KRT24,LIPE,LUC7L2,NHLH1,PAX7,PAXIP1,PDE3A,PIK3R5,PPP1R9A,PRODH2,PTPRF,PUF60,RND1,SERPINA4,SERPINA6,SERPINF2,SLC1A3,SLC27A6,SLC5A1,TF,TMPRSS3,TNNT3,TNPO3,UBE3C,USH1C,VANGL1,VAT1,VTCN1,ZNF16	47
Dermatological Diseases and Conditions, Organismal Injury and Abnormalities	Skin lesion	4.52e-12	ABCC2,AMBP,AQP7,CACNA1I,CIDEA,CPN1,DUOX2,DUSP13,F2,FGB,FGFR2,GCKR,GJA3,GLP2R,GPD1,HYAL1,INSL3,KRIT1,KRT24,LIPE,LUC7L2,MSH6,NHLH1,PAX7,PAXIP1,PDE3A,PIK3R5,PPP1R9A,PRODH2,PTPRF,RND1,SERPINA4,SERPINA6,SERPINF2,SLC1A3,SLC27A6,SLC5A1,TF,TMPRSS3,TNPO3,UBE3C,USH1C,VANGL1,VAT1,VTCN1	45
Cancer, Gastrointestinal Disease, Organismal Injury and Abnormalities	Large intestine adenocarcinoma	7.07e-12	ABCC2,ALAS2,AMBP,AQP7,CACNA1I,CCNH,CIDEA,CPN1,CUL1,DUOX2,F2,FGB,FGFR2,GCKR,GJA3,GLP2R,GPD1,KRIT1,LUC7L2,MSH6,NXT2,PAX7,PAXIP1,PDE3A,PF4V1,PGLYRP1,PIK3R5,PPP1R9A,PRODH2,PTPRF,PUF60,RALBP1,RND1,RNF38,SERPINA4,SERPINA6,SERPINF2,SLC1A3,SLC27A6,SLC5A1,SSPN,TBP,TF,TMPRSS3,TNNT3,TNPO3,UBE3C,USH1C,VTCN1,ZNF16	50
Cancer, Dermatological Diseases and Conditions, Organismal Injury and Abnormalities	Skin tumor	1.91e-11	ABCC2,AMBP,AQP7,CACNA1I,CPN1,DUOX2,DUSP13,F2,FGB,FGFR2,GCKR,GJA3,GLP2R,GPD1,HYAL1,INSL3,KRIT1,KRT24,LIPE,LUC7L2,MSH6,NHLH1,PAX7,PAXIP1,PDE3A,PIK3R5,PPP1R9A,PRODH2,PTPRF,RND1,SERPINA4,SERPINA6,SERPINF2,SLC1A3,SLC27A6,SLC5A1,TF,TMPRSS3,TNPO3,UBE3C,USH1C,VANGL1,VAT1,VTCN1	44
Cancer, Dermatological Diseases and Conditions, Organismal Injury and Abnormalities	Cutaneous melanoma	3.98e-11	ABCC2,AMBP,CACNA1I,CPN1,DUOX2,DUSP13,F2,FGB,FGFR2,GCKR,GJA3,GLP2R,GPD1,HYAL1,INSL3,KRIT1,KRT24,LIPE,LUC7L2,NHLH1,PAX7,PAXIP1,PDE3A,PIK3R5,PPP1R9A,PRODH2,PTPRF,RND1,SERPINA4,SERPINA6,SERPINF2,SLC1A3,SLC27A6,SLC5A1,TF,TMPRSS3,TNPO3,UBE3C,USH1C,VANGL1,VAT1,VTCN1	42
Cancer, Organismal Injury and Abnormalities	Abdominal cancer	4.42e-11	ABCC2,ALAS2,AMBP,AQP7,CACNA1I,CASP2,CCNH,CIDEA,CPN1,CUL1,DUOX2,F2,FGB,FGFR2,GCKR,GJA3,GLP2R,GPD1,INSL3,KRIT1,KRT24,LIPE,LUC7L2,MKRN1,MSH6,NHLH1,NXT2,PAX7,PAXIP1,PDE3A,PF4V1,PGLYRP1,PIK3R5,PPP1R9A,PRODH2,PTPRF,PUF60,RALBP1,RND1,RNF38,SERPINA4,SERPINA6,SERPINF2,SLC1A3,SLC27A6,SLC5A1,SSPN,TBP,TF,TMPRSS3,TNNT3,TNPO3,UBE3C,USH1C,VTCN1,ZNF16	56
Cancer, Dermatological Diseases and Conditions, Organismal Injury and Abnormalities	Skin cancer	7.76e-11	ABCC2,AMBP,AQP7,CACNA1I,CPN1,DUOX2,DUSP13,F2,FGB,FGFR2,GCKR,GJA3,GLP2R,GPD1,HYAL1,INSL3,KRIT1,KRT24,LIPE,LUC7L2,NHLH1,PAX7,PAXIP1,PDE3A,PIK3R5,PPP1R9A,PRODH2,PTPRF,RND1,SERPINA4,SERPINA6,SERPINF2,SLC1A3,SLC27A6,SLC5A1,TF,TMPRSS3,TNPO3,UBE3C,USH1C,VANGL1,VAT1,VTCN1	43
Cancer, Organismal Injury and Abnormalities	Genitourinary tumor	1.2e-08	ABCC2,ALAS2,AMBP,AQP7,CASP2,CIDEA,CPN1,CUL1,DUOX2,F2,FGFR2,GLP2R,HYAL1,INSL3,KRIT1,KRT24,LIPE,LUC7L2,MKRN1,MSH6,NHLH1,PAX7,PDE3A,PIK3R5,PPP1R9A,PTPRF,PUF60,RALBP1,SERPINA4,SERPINA6,SLC1A3,SLC5A1,TBP,TF,TMPRSS3,TNNT3,TNPO3,UBE3C,USH1C,VTCN1,ZNF16	41
Cancer, Organismal Injury and Abnormalities	Abdominal carcinoma	8.77e-08	ABCC2,ALAS2,AMBP,AQP7,CACNA1I,CASP2,CIDEA,CPN1,CUL1,DUOX2,F2,FGB,FGFR2,GJA3,GLP2R,KRIT1,KRT24,LUC7L2,MSH6,PAX7,PAXIP1,PDE3A,PIK3R5,PPP1R9A,PRODH2,PTPRF,RALBP1,RND1,RNF38,SERPINA4,SERPINA6,SLC1A3,SLC27A6,SLC5A1,TBP,TF,TMPRSS3,TNNT3,TNPO3,UBE3C,USH1C,ZNF16	42
Cancer, Organismal Injury and Abnormalities	Urogenital cancer	8.92e-08	ABCC2,ALAS2,AMBP,AQP7,CASP2,CIDEA,CPN1,CUL1,DUOX2,F2,FGFR2,GLP2R,INSL3,KRIT1,KRT24,LIPE,LUC7L2,MKRN1,MSH6,NHLH1,PAX7,PDE3A,PIK3R5,PPP1R9A,PTPRF,PUF60,RALBP1,SERPINA4,SERPINA6,SLC1A3,SLC5A1,TBP,TF,TMPRSS3,TNNT3,UBE3C,USH1C,VTCN1,ZNF16	39
Cancer, Organismal Injury and Abnormalities, Reproductive System Disease	Tumorigenesis of reproductive tract	1.96e-07	ABCC2,CASP2,CIDEA,DUOX2,F2,FGFR2,GLP2R,HYAL1,INSL3,KRIT1,KRT24,LUC7L2,MSH6,PAX7,PDE3A,PIK3R5,PPP1R9A,PTPRF,RALBP1,SERPINA4,SLC1A3,SLC5A1,TF,TMPRSS3,TNNT3,TNPO3,UBE3C,USH1C,VTCN1,ZNF16	30
Cancer, Organismal Injury and Abnormalities, Reproductive System Disease	Female genital neoplasm	2.06e-07	ABCC2,CASP2,CIDEA,DUOX2,F2,FGFR2,GLP2R,HYAL1,INSL3,KRIT1,KRT24,LUC7L2,MSH6,PAX7,PDE3A,PIK3R5,PPP1R9A,PTPRF,RALBP1,SERPINA4,SLC1A3,SLC5A1,TF,TMPRSS3,TNNT3,TNPO3,UBE3C,USH1C,VTCN1,ZNF16	30
Cancer, Gastrointestinal Disease, Hepatic System Disease, Liver Hyperplasia/Hyperproliferation, Organismal Injury and Abnormalities	Liver tumor	2.43e-07	ABCC2,AMBP,AQP7,CACNA1I,CASP2,CIDEA,CUL1,DUOX2,DUSP13,F2,FGB,FGFR2,GCKR,GLP2R,GPD1,HYAL1,KRIT1,KRT24,LUC7L2,MSH6,NXT2,PAX7,PAXIP1,PDE3A,PIK3R5,PPP1R9A,PRODH2,PTPRF,PUF60,RAB5C,RALBP1,RNF38,SLC1A3,SLC27A6,SLC5A1,TBP,TF,TNNT3,UBE3C,USH1C,VAT1,VTCN1	42
Cancer, Organismal Injury and Abnormalities, Reproductive System Disease	Genital tumor	2.99e-07	ABCC2,AQP7,CASP2,CIDEA,CUL1,DUOX2,F2,FGFR2,GLP2R,HYAL1,INSL3,KRIT1,KRT24,LIPE,LUC7L2,MKRN1,MSH6,NHLH1,PAX7,PDE3A,PIK3R5,PPP1R9A,PTPRF,RALBP1,SERPINA4,SERPINA6,SLC1A3,SLC5A1,TBP,TF,TMPRSS3,TNNT3,TNPO3,UBE3C,USH1C,VTCN1,ZNF16	37
Cancer, Organismal Injury and Abnormalities	Genitourinary carcinoma	3.04e-07	ABCC2,ALAS2,AMBP,AQP7,CASP2,CIDEA,CPN1,CUL1,DUOX2,F2,FGFR2,GLP2R,KRIT1,KRT24,LIPE,LUC7L2,MKRN1,MSH6,NHLH1,PAX7,PDE3A,PIK3R5,PPP1R9A,PTPRF,PUF60,RALBP1,SERPINA4,SERPINA6,SLC1A3,SLC5A1,TBP,TMPRSS3,TNNT3,UBE3C,USH1C,ZNF16	36
Cancer, Organismal Injury and Abnormalities	Development of carcinoma	3.48e-07	ABCC2,ALAS2,AMBP,AQP7,CASP2,CIDEA,CPN1,CUL1,DUOX2,F2,FGB,FGFR2,GJA3,GLP2R,KRIT1,KRT24,LUC7L2,MSH6,PAX7,PAXIP1,PDE3A,PIK3R5,PPP1R9A,PRODH2,PTPRF,RALBP1,RND1,RNF38,SERPINA4,SLC1A3,SLC27A6,SLC5A1,TBP,TF,TMPRSS3,TNNT3,TNPO3,UBE3C,USH1C,ZNF16	40
Cancer, Organismal Injury and Abnormalities	Abdominal adenocarcinoma	6.35e-07	ABCC2,ALAS2,AMBP,AQP7,CACNA1I,CASP2,CPN1,CUL1,DUOX2,F2,FGB,FGFR2,GJA3,GLP2R,KRIT1,KRT24,LUC7L2,MSH6,PAX7,PAXIP1,PDE3A,PIK3R5,PPP1R9A,PRODH2,PTPRF,RALBP1,RND1,RNF38,SERPINA6,SLC1A3,SLC27A6,SLC5A1,TBP,TF,TMPRSS3,TNNT3,TNPO3,UBE3C,USH1C,ZNF16	40
Cancer, Organismal Injury and Abnormalities	Development of adenocarcinoma	6.43e-07	ABCC2,ALAS2,AMBP,AQP7,CASP2,CPN1,DUOX2,F2,FGB,FGFR2,GLP2R,KRIT1,KRT24,LUC7L2,MSH6,PAX7,PDE3A,PIK3R5,PPP1R9A,PTPRF,RALBP1,SERPINA4,SLC1A3,SLC27A6,SLC5A1,TBP,TMPRSS3,TNNT3,UBE3C,USH1C	30
Cancer, Organismal Injury and Abnormalities	Breast or colorectal cancer	1.1e-06	ABCC2,ALAS2,CACNA1I,CASP2,CUL1,DUOX2,F2,FGB,FGFR2,GJA3,LIPE,LUC7L2,MSH6,PAX7,PAXIP1,PDE3A,PIK3R5,PPP1R9A,PRODH2,PTPRF,PUF60,RAB5C,RALBP1,RND1,RNF38,SLC1A3,SLC27A6,SLC5A1,SSPN,TBP,TF,TMPRSS3,TNNT3,TNPO3,UBE3C,VANGL1,ZNF16	37
Cancer, Organismal Injury and Abnormalities, Reproductive System Disease	Female genital tract cancer	1.16e-06	ABCC2,CASP2,CIDEA,DUOX2,F2,FGFR2,GLP2R,INSL3,KRIT1,KRT24,LUC7L2,MSH6,PAX7,PDE3A,PIK3R5,PPP1R9A,PTPRF,RALBP1,SERPINA4,SLC1A3,SLC5A1,TF,TMPRSS3,TNNT3,UBE3C,USH1C,VTCN1,ZNF16	28
Cancer, Organismal Injury and Abnormalities	Pelvic cancer	1.65e-06	ABCC2,AQP7,CASP2,CIDEA,CUL1,DUOX2,F2,FGFR2,GLP2R,INSL3,KRIT1,KRT24,LIPE,LUC7L2,MKRN1,MSH6,NHLH1,PAX7,PDE3A,PIK3R5,PPP1R9A,PTPRF,PUF60,RALBP1,SERPINA4,SERPINA6,SLC1A3,SLC5A1,TBP,TF,TMPRSS3,TNNT3,UBE3C,USH1C,VTCN1,ZNF16	36
Cancer, Organismal Injury and Abnormalities, Reproductive System Disease	Genital tract cancer	1.87e-06	ABCC2,AQP7,CASP2,CIDEA,CUL1,DUOX2,F2,FGFR2,GLP2R,INSL3,KRIT1,KRT24,LIPE,LUC7L2,MKRN1,MSH6,NHLH1,PAX7,PDE3A,PIK3R5,PPP1R9A,PTPRF,RALBP1,SERPINA4,SERPINA6,SLC1A3,SLC5A1,TBP,TF,TMPRSS3,TNNT3,UBE3C,USH1C,VTCN1,ZNF16	35
Cell Cycle	Mitogenesis of epithelial cells	3.57e-06	F2,FGFR2,PTPRF	3
Cancer, Organismal Injury and Abnormalities, Reproductive System Disease	Malignant neoplasm of male genital organ	7.95e-06	AQP7,CUL1,DUOX2,F2,FGFR2,INSL3,KRT24,LIPE,MKRN1,MSH6,NHLH1,PAX7,PDE3A,PIK3R5,PPP1R9A,PTPRF,RALBP1,SERPINA4,SERPINA6,SLC1A3,TBP,TF,TNNT3,UBE3C,USH1C	25
Cancer, Organismal Injury and Abnormalities, Renal and Urological Disease	Urinary tract cancer	1.26e-05	ALAS2,AMBP,AQP7,CASP2,CPN1,CUL1,FGFR2,INSL3,PDE3A,PIK3R5,PUF60,RALBP1,TBP,TF,UBE3C	15
Cancer, Organismal Injury and Abnormalities, Reproductive System Disease	Prostate cancer	2.05e-05	AQP7,CUL1,DUOX2,F2,FGFR2,KRT24,LIPE,MKRN1,MSH6,NHLH1,PAX7,PDE3A,PIK3R5,PPP1R9A,PTPRF,RALBP1,SERPINA4,SERPINA6,SLC1A3,TBP,TF,TNNT3,UBE3C,USH1C	24
Developmental Disorder, Hematological Disease, Hereditary Disorder, Immunological Disease, Organismal Injury and Abnormalities	Congenital afibrinogenemia	2.12e-05	F2,FGB	2
Cancer, Organismal Injury and Abnormalities	Neoplasia of cells	2.21e-05	AQP7,CASP2,CCNH,CUL1,DUOX2,F2,FGFR2,GCKR,GJA3,HYAL1,INSL3,KRIT1,MSH6,PDE3A,PIK3R5,PPP1R9A,PTPRF,RALBP1,SERPINA4,SLC27A6,SLC5A1,TBP,TF,TNNT3,UBE3C,USH1C,VANGL1,VTCN1,ZNF16	29
Cancer, Organismal Injury and Abnormalities	Cancer of cells	3.08e-05	AQP7,CASP2,CCNH,CUL1,DUOX2,F2,FGFR2,GCKR,GJA3,HYAL1,INSL3,KRIT1,MSH6,PDE3A,PIK3R5,PPP1R9A,PTPRF,RALBP1,SERPINA4,SLC27A6,SLC5A1,TBP,TF,TNNT3,UBE3C,USH1C,VTCN1,ZNF16	28
Cardiovascular System Development and Function, Tissue Development	Proliferation of endothelial tissue	3.52e-05	KRIT1,SERPINF2	2
Carbohydrate Metabolism, Molecular Transport, Small Molecule Biochemistry	Clearance of D-glucose	4.43e-05	GCKR,LIPE,PTPRF	3
Cancer, Gastrointestinal Disease, Organismal Injury and Abnormalities	Colorectal adenocarcinoma	4.6e-05	ALAS2,CUL1,DUOX2,F2,FGB,FGFR2,GJA3,LUC7L2,MSH6,PAX7,PAXIP1,PDE3A,PIK3R5,PPP1R9A,PRODH2,PTPRF,RND1,RNF38,SLC1A3,SLC27A6,TBP,TF,TMPRSS3,TNPO3,UBE3C,ZNF16	26
Cellular Development, Cellular Growth and Proliferation, Organ Development, Skeletal and Muscular System Development and Function, Tissue Development	Proliferation of muscle cells	5.41e-05	ABCC2,F2,FGFR2,PAX7,PDE3A,PTPRF,RALBP1,SERPINF2	8
Cancer, Neurological Disease, Organismal Injury and Abnormalities	Glioma	5.47e-05	AQP7,CASP2,FGFR2,KRIT1,KRT24,MSH6,RNF38,TBP,TF,TNNT3,USH1C,VANGL1	12
Cancer, Organismal Injury and Abnormalities, Reproductive System Disease	Prostatic carcinoma	5.6e-05	AQP7,CUL1,DUOX2,FGFR2,KRT24,LIPE,MKRN1,NHLH1,PAX7,PDE3A,PIK3R5,PPP1R9A,PTPRF,RALBP1,SERPINA4,SERPINA6,SLC1A3,TBP,TNNT3,UBE3C,USH1C	21
Cancer, Organismal Injury and Abnormalities	Breast or ovarian carcinoma	6.06e-05	ABCC2,CACNA1I,CASP2,F2,FGFR2,KRT24,LIPE,MSH6,PAX7,PDE3A,PIK3R5,PRODH2,PTPRF,RAB5C,RALBP1,SLC5A1,SSPN,TF,TMPRSS3,TNNT3,VANGL1	21
Cancer, Neurological Disease, Organismal Injury and Abnormalities	Astrocytoma	6.32e-05	AQP7,CASP2,FGFR2,KRIT1,KRT24,MSH6,RNF38,TBP,TF,USH1C,VANGL1	11
Cellular Development, Cellular Growth and Proliferation, Organ Development, Skeletal and Muscular System Development and Function, Tissue Development	Proliferation of smooth muscle cells	6.79e-05	ABCC2,F2,FGFR2,PDE3A,PTPRF,RALBP1,SERPINF2	7
Cancer, Gastrointestinal Disease, Organismal Injury and Abnormalities	Colon adenocarcinoma	7.24e-05	ALAS2,CUL1,DUOX2,F2,FGB,FGFR2,GJA3,LUC7L2,MSH6,PAX7,PAXIP1,PDE3A,PIK3R5,PRODH2,PTPRF,RND1,RNF38,SLC1A3,SLC27A6,TBP,TF,TMPRSS3,TNPO3,UBE3C,ZNF16	25
Metabolic Disease	Disorder of lipid metabolism	8.35e-05	F2,FGFR2,GLP2R,GPD1,KRIT1,LIPE,MSH6	7
Cancer, Organismal Injury and Abnormalities, Reproductive System Disease	Prostatic adenocarcinoma	8.72e-05	AQP7,CUL1,DUOX2,KRT24,LIPE,MKRN1,NHLH1,PAX7,PDE3A,PIK3R5,PPP1R9A,PTPRF,RALBP1,SERPINA4,SERPINA6,SLC1A3,TBP,TNNT3,UBE3C,USH1C	20
Embryonic Development, Organismal Development	Growth of blastocyst	9.29e-05	F2,FGFR2,TBP	3
Carbohydrate Metabolism, Molecular Transport	Transport of carbohydrate	0.000108	ABCC2,AQP7,F2,RALBP1,SLC1A3,SLC5A1	6
Cancer, Organismal Injury and Abnormalities, Reproductive System Disease	Development of genital tumor	0.000112	ABCC2,CASP2,CIDEA,DUOX2,F2,FGFR2,GLP2R,KRIT1,KRT24,LUC7L2,MSH6,PAX7,PDE3A,PIK3R5,PPP1R9A,PTPRF,SLC1A3,SLC5A1,TMPRSS3,TNNT3,UBE3C,USH1C	22
Cancer, Organismal Injury and Abnormalities	Endometrioid carcinoma	0.000133	ABCC2,CASP2,DUOX2,FGFR2,GLP2R,KRIT1,KRT24,LUC7L2,MSH6,PAX7,PDE3A,PIK3R5,PPP1R9A,PTPRF,SLC1A3,SLC5A1,TMPRSS3,TNNT3,UBE3C,USH1C	20
Connective Tissue Disorders, Inflammatory Disease, Organismal Injury and Abnormalities, Skeletal and Muscular Disorders	Rheumatic Disease	0.000164	ABCC2,ALAS2,FGB,FGFR2,HYAL1,INSL3,LIPE,PDE3A,PGLYRP1,SLC1A3,TF,TNPO3,VTCN1	13
Cancer, Organismal Injury and Abnormalities, Reproductive System Disease	Uterine tumor	0.000169	ABCC2,CIDEA,DUOX2,FGFR2,GLP2R,HYAL1,INSL3,KRIT1,LUC7L2,MSH6,PPP1R9A,PTPRF,SERPINA4,SLC1A3,SLC5A1,TMPRSS3,TNNT3,TNPO3,UBE3C,USH1C,ZNF16	21
Auditory Disease, Neurological Disease	Nonsyndromic sensorineural hearing loss	0.000176	SLC1A3,TMPRSS3,USH1C	3
Cancer, Organismal Injury and Abnormalities	Lymphoreticular neoplasm	0.000183	AQP7,CASP2,CCNH,CUL1,F2,FGFR2,GCKR,HYAL1,INSL3,LUC7L2,MSH6,PDE3A,PIK3R5,PTPRF,SLC27A6,SLC5A1,TBP,TF,TNPO3,UBE3C	20
Cell Cycle, Hepatic System Development and Function	Mitogenesis of hepatocytes	0.000192	F2,PTPRF	2
Organ Morphology, Reproductive System Development and Function, Tissue Morphology	Quantity of gonadal cells	0.000196	CASP2,FGFR2,INSL3,LIPE,TF	5
Cancer, Endocrine System Disorders, Organismal Injury and Abnormalities, Reproductive System Disease	Gonadal tumor	0.000198	CASP2,F2,FGFR2,INSL3,KRT24,MSH6,PAX7,PDE3A,PIK3R5,PTPRF,RALBP1,TF,TMPRSS3,VTCN1	14
Cancer, Gastrointestinal Disease, Hepatic System Disease, Organismal Injury and Abnormalities	Hepatobiliary system cancer	0.000203	ABCC2,AMBP,AQP7,CACNA1I,CASP2,F2,FGB,FGFR2,LUC7L2,MSH6,PAX7,PAXIP1,PIK3R5,PPP1R9A,PRODH2,PTPRF,PUF60,RNF38,SERPINA6,SLC1A3,SLC27A6,TBP,TF,UBE3C,USH1C,VTCN1	26
Carbohydrate Metabolism, Molecular Transport, Small Molecule Biochemistry	Concentration of D-glucose	0.000205	AQP7,CIDEA,F2,GCKR,LIPE,SLC5A1,VTCN1	7
Embryonic Development, Organ Development, Organismal Development, Tissue Development	Development of sensory organ	0.000214	DUOX2,FGFR2,GJA3,PF4V1,PTPRF,RALBP1,SLC1A3,USH1C	8
Carbohydrate Metabolism	Uptake of carbohydrate	0.000215	ABCC2,AQP7,FGFR2,LIPE,PTPRF,SLC1A3,SLC5A1	7
Carbohydrate Metabolism, Molecular Transport, Small Molecule Biochemistry	Absorption of D-glucose	0.000231	FGFR2,SLC5A1	2
Cardiovascular Disease, Dermatological Diseases and Conditions, Organismal Injury and Abnormalities	Stasis ulcer	0.000231	F2,FGB	2
Carbohydrate Metabolism, Drug Metabolism, Molecular Transport, Small Molecule Biochemistry	Transport of doxorubicin	0.000231	ABCC2,RALBP1	2
Cancer, Organismal Injury and Abnormalities, Reproductive System Disease	Female genital tract adenocarcinoma	0.000232	ABCC2,CASP2,DUOX2,F2,FGFR2,GLP2R,KRIT1,KRT24,LUC7L2,MSH6,PAX7,PDE3A,PIK3R5,PPP1R9A,PTPRF,SLC1A3,SLC5A1,TMPRSS3,TNNT3,UBE3C,USH1C	21
Cancer, Hematological Disease, Immunological Disease, Organismal Injury and Abnormalities	Leukemia	0.000237	AQP7,CUL1,F2,FGFR2,GCKR,HYAL1,INSL3,LUC7L2,MSH6,PDE3A,SLC27A6,TBP,TF,TNPO3,UBE3C	15
Cell Morphology, Connective Tissue Development and Function, Tissue Morphology	Size of adipocytes	0.000241	AQP7,CIDEA,F2,LIPE	4
Cancer, Hematological Disease, Organismal Injury and Abnormalities	Hematologic cancer	0.000256	AQP7,CASP2,CCNH,CUL1,F2,FGFR2,GCKR,HYAL1,INSL3,LUC7L2,MSH6,PDE3A,PIK3R5,PTPRF,SLC27A6,SLC5A1,TBP,TF,TNPO3,UBE3C	20
Cancer, Neurological Disease, Organismal Injury and Abnormalities	Brain glioma formation	0.00026	AQP7,KRIT1,KRT24,MSH6,RNF38,TBP,TNNT3,VANGL1	8
Digestive System Development and Function, Gastrointestinal Disease, Organ Morphology, Organismal Development, Organismal Injury and Abnormalities	Abnormal morphology of large intestine	0.000261	FGFR2,SLC5A1,USH1C	3
Cancer, Endocrine System Disorders, Organismal Injury and Abnormalities, Reproductive System Disease	Ovarian cancer	0.000277	CASP2,F2,FGFR2,KRT24,MSH6,PAX7,PDE3A,PIK3R5,PTPRF,RALBP1,TF,TMPRSS3,VTCN1	13
Cancer, Gastrointestinal Disease, Organismal Injury and Abnormalities	Development of digestive organ tumor	0.000301	ALAS2,CASP2,CUL1,DUOX2,F2,FGB,FGFR2,GJA3,LUC7L2,MSH6,PAX7,PAXIP1,PDE3A,PIK3R5,PPP1R9A,PRODH2,PTPRF,RND1,RNF38,SLC1A3,SLC27A6,TBP,TF,TMPRSS3,TNPO3,UBE3C,ZNF16	27
Hematological Disease, Immunological Disease	Lymphoproliferative disorder	0.000316	AQP7,CASP2,CCNH,CUL1,F2,FGFR2,INSL3,MSH6,PDE3A,PIK3R5,PTPRF,SLC27A6,SLC5A1,TBP,TF,UBE3C	16
Drug Metabolism, Molecular Transport, Small Molecule Biochemistry	Transport of vinblastine	0.000317	ABCC2,RALBP1	2
Neurological Disease, Organismal Injury and Abnormalities	Brain lesion	0.000365	AQP7,F2,KRIT1,KRT24,MSH6,PDE3A,RNF38,TBP,TNNT3,VANGL1	10
Carbohydrate Metabolism, Molecular Transport, Small Molecule Biochemistry	Transport of polyols	0.000365	AQP7,SLC5A1	2
Cancer, Gastrointestinal Disease, Organismal Injury and Abnormalities	Colorectal cancer	0.000378	ALAS2,CUL1,DUOX2,F2,FGB,FGFR2,GJA3,LUC7L2,MSH6,PAX7,PAXIP1,PDE3A,PIK3R5,PPP1R9A,PRODH2,PTPRF,PUF60,RND1,RNF38,SLC1A3,SLC27A6,TBP,TF,TMPRSS3,TNPO3,UBE3C,ZNF16	27
Cancer, Gastrointestinal Disease, Hepatic System Disease, Liver Hyperplasia/Hyperproliferation, Organismal Injury and Abnormalities	Liver cancer	0.000386	ABCC2,AMBP,AQP7,CACNA1I,CASP2,F2,FGB,FGFR2,LUC7L2,MSH6,PAX7,PAXIP1,PIK3R5,PPP1R9A,PRODH2,PTPRF,PUF60,RNF38,SLC1A3,SLC27A6,TBP,TF,UBE3C,USH1C,VTCN1	25
Cancer, Hematological Disease, Immunological Disease, Organismal Injury and Abnormalities	Lymphoma	0.000392	CASP2,CCNH,CUL1,F2,FGFR2,INSL3,MSH6,PDE3A,PIK3R5,PTPRF,SLC27A6,SLC5A1,TBP,TF,UBE3C	15
Connective Tissue Development and Function, Connective Tissue Disorders, Developmental Disorder, Gastrointestinal Disease, Organ Morphology, Organismal Development, Organismal Injury and Abnormalities, Skeletal and Muscular Disorders, Skeletal and Muscular System Development and Function, Tissue Development	Abnormal morphology of short maxilla	0.000417	FGFR2,PAX7	2
Cancer, Gastrointestinal Disease, Hepatic System Disease, Liver Hyperplasia/Hyperproliferation, Organismal Injury and Abnormalities	Liver carcinoma	0.000503	ABCC2,AQP7,CACNA1I,CASP2,F2,FGB,FGFR2,LUC7L2,MSH6,PAX7,PAXIP1,PIK3R5,PPP1R9A,PRODH2,PTPRF,PUF60,RNF38,SLC1A3,SLC27A6,TBP,TF,UBE3C,USH1C,VTCN1	24
Cardiovascular Disease, Cell Death and Survival, Organismal Injury and Abnormalities	Myocardial necrosis	0.000516	F2,PDE3A,SERPINA4	3
Connective Tissue Development and Function, Tissue Development	Function of white adipose tissue	0.000531	AQP7,LIPE	2
Cancer, Organismal Injury and Abnormalities, Renal and Urological Disease	Renal cell carcinoma	0.000557	ALAS2,AMBP,AQP7,CASP2,CPN1,FGFR2,PIK3R5,RALBP1,TBP,UBE3C	10
Cell Cycle, Hair and Skin Development and Function	Mitogenesis of epithelial cell lines	0.000592	F2,FGFR2	2
Cellular Development, Cellular Growth and Proliferation, Embryonic Development, Organismal Development, Tissue Development	Proliferation of trophoblast cells	0.000592	F2,FGFR2	2
Cancer, Organismal Injury and Abnormalities, Reproductive System Disease	Breast or ovarian cancer	0.000598	ABCC2,CACNA1I,CASP2,F2,FGFR2,KRT24,LIPE,MSH6,PAX7,PDE3A,PIK3R5,PRODH2,PTPRF,RAB5C,RALBP1,SLC5A1,SSPN,TF,TMPRSS3,TNNT3,VANGL1,VTCN1	22
Cancer, Organismal Injury and Abnormalities, Reproductive System Disease	Uterine carcinoma	0.000641	ABCC2,CIDEA,DUOX2,FGFR2,GLP2R,KRIT1,LUC7L2,MSH6,PPP1R9A,PTPRF,SERPINA4,SLC1A3,SLC5A1,TMPRSS3,TNNT3,UBE3C,USH1C,ZNF16	18
Cancer, Hematological Disease, Immunological Disease, Organismal Injury and Abnormalities	Acute leukemia	0.000649	AQP7,CUL1,F2,FGFR2,GCKR,HYAL1,LUC7L2,MSH6,PDE3A,SLC27A6,TF,TNPO3	12
Inflammatory Disease	Chronic inflammatory disorder	0.000657	ABCC2,ALAS2,DUOX2,F2,FGB,FGFR2,HYAL1,INSL3,PDE3A,PGLYRP1,TF,VTCN1	12
Hematological System Development and Function, Inflammatory Response, Tissue Morphology	Quantity of neutrophils	0.000663	AMBP,PGLYRP1,PIK3R5,TF,VTCN1	5
Cardiovascular System Development and Function, Cell-To-Cell Signaling and Interaction	Binding of endothelial cell lines	0.0007	F2,PF4V1,SERPINF2	3
Cancer, Organismal Injury and Abnormalities, Reproductive System Disease	Uterine cancer	0.000731	ABCC2,CIDEA,DUOX2,FGFR2,GLP2R,INSL3,KRIT1,LUC7L2,MSH6,PPP1R9A,PTPRF,SERPINA4,SLC1A3,SLC5A1,TMPRSS3,TNNT3,UBE3C,USH1C,ZNF16	19
Connective Tissue Disorders, Inflammatory Disease, Inflammatory Response, Organismal Injury and Abnormalities, Skeletal and Muscular Disorders	Inflammation of joint	0.000733	ABCC2,ALAS2,FGB,HYAL1,INSL3,LIPE,PDE3A,PGLYRP1,SLC1A3,TF,VTCN1	11
Cell Morphology, Embryonic Development, Nervous System Development and Function, Neurological Disease, Ophthalmic Disease, Organ Development, Organ Morphology, Organismal Development, Organismal Injury and Abnormalities, Tissue Development, Tissue Morphology, Visual System Development and Function	Abnormal morphology of retinal ganglion cells	0.000797	PTPRF,SLC1A3	2
Organ Morphology, Reproductive System Development and Function, Tissue Morphology	Quantity of spermatids	0.000797	INSL3,LIPE	2
Reproductive System Development and Function	Morphology of reproductive system	0.000812	AMBP,AQP7,CASP2,FGFR2,INSL3,LIPE,PTPRF,TF	8
Cancer, Neurological Disease, Organismal Injury and Abnormalities	Brain astrocytoma	0.000837	AQP7,KRIT1,KRT24,MSH6,RNF38,TBP,VANGL1	7
Cancer, Organismal Injury and Abnormalities, Renal and Urological Disease	Bladder cancer	0.000874	AQP7,CASP2,CUL1,FGFR2,PDE3A,PUF60,TF	7
Cardiovascular Disease, Neurological Disease, Organismal Injury and Abnormalities	Cerebral small vessel disease	0.00095	F2,PDE3A	2
Metabolic Disease	Glucose metabolism disorder	0.000967	AMBP,AQP7,F2,FGFR2,GCKR,GPD1,HYAL1,INSL3,LIPE,PDE3A,TF,UBE3C,VTCN1	13
Cancer, Organismal Injury and Abnormalities, Reproductive System Disease	Invasive breast carcinoma	0.00102	CASP2,FGFR2,PTPRF,RALBP1,SSPN	5
Carbohydrate Metabolism	Quantity of carbohydrate	0.00108	AMBP,AQP7,CIDEA,F2,GCKR,LIPE,SLC5A1,VTCN1	8
Cancer, Organismal Injury and Abnormalities, Renal and Urological Disease	Bladder carcinoma	0.00109	AQP7,CASP2,CUL1,FGFR2,PDE3A,PUF60	6
Neurological Disease	Neurodegeneration	0.00115	DUOX2,F2,FGFR2,SERPINF2,SLC1A3,TBP	6
Cancer, Organismal Injury and Abnormalities	Mucinous adenocarcinoma	0.00131	CASP2,FGFR2,PTPRF	3
Auditory Disease, Developmental Disorder, Hereditary Disorder, Neurological Disease, Organismal Injury and Abnormalities	Autosomal recessive prelingual nonsyndromic sensorineural hearing loss	0.00139	TMPRSS3,USH1C	2
Drug Metabolism, Molecular Transport	Transport of drug	0.00139	ABCC2,RALBP1	2
Organismal Survival	Organismal death	0.00139	ALAS2,AMBP,CASP2,CUL1,F2,FGFR2,GLP2R,KRIT1,MSH6,NHLH1,PAX7,PPP1R9A,PTPRF,SERPINA6,SERPINF2,SLC1A3,SLC5A1,TBP,TF,VTCN1	20
Cancer, Organismal Injury and Abnormalities	Cancer of secretory structure	0.00141	AQP7,CACNA1I,CUL1,DUOX2,F2,FGFR2,KRT24,LIPE,MKRN1,MSH6,NHLH1,PAX7,PDE3A,PIK3R5,PPP1R9A,PRODH2,PTPRF,RALBP1,SERPINA4,SERPINA6,SLC1A3,TBP,TF,TNNT3,UBE3C,USH1C	26
Organ Morphology, Reproductive System Development and Function, Tissue Morphology	Quantity of germ cells	0.00143	CASP2,FGFR2,INSL3,LIPE	4
Tissue Morphology	Quantity of cells	0.00144	AMBP,CASP2,CIDEA,F2,FGFR2,INSL3,LIPE,NHLH1,PAX7,PGLYRP1,PIK3R5,PTPRF,SLC1A3,TF,VTCN1	15
Cellular Development, Cellular Growth and Proliferation, Embryonic Development	Proliferation of embryonic cell lines	0.00144	CCNH,CUL1,F2,FGFR2,VTCN1	5
Cell Morphology, Nervous System Development and Function, Neurological Disease, Tissue Morphology	Abnormal morphology of sensory neurons	0.00148	PTPRF,SLC1A3,USH1C	3
Cell Death and Survival	Cell death of adipocytes	0.00149	CIDEA,LIPE	2
Hematological System Development and Function	Fibrinolysis	0.00149	F2,FGB	2
Nutritional Disease	Obesity	0.00154	AQP7,CACNA1I,CIDEA,F2,LIPE,PDE3A,RALBP1	7
Embryonic Development, Nervous System Development and Function, Organ Development, Organismal Development, Tissue Development, Visual System Development and Function	Formation of eye	0.00158	FGFR2,GJA3,PF4V1,PTPRF,RALBP1,SLC1A3	6
Embryonic Development, Nervous System Development and Function, Ophthalmic Disease, Organ Development, Organ Morphology, Organismal Development, Organismal Injury and Abnormalities, Tissue Development, Visual System Development and Function	Abnormal morphology of inner nuclear layer	0.00159	PTPRF,SLC1A3	2
Digestive System Development and Function, Organ Development	Function of intestine	0.00159	GLP2R,SLC5A1	2
Inflammatory Disease	Severe inflammatory disorder	0.00165	FGFR2,PDE3A,PGLYRP1,VTCN1	4
Cell Death and Survival, Cellular Compromise, Neurological Disease, Tissue Morphology	Degeneration of neurons	0.00167	F2,FGFR2,SERPINF2,SLC1A3,TBP	5
Carbohydrate Metabolism	Release of carbohydrate	0.00167	AQP7,F2,LIPE	3
Developmental Disorder, Organismal Injury and Abnormalities, Renal and Urological Disease	Congenital abnormality of the lower urinary tract	0.00169	FGFR2,PTPRF	2
Carbohydrate Metabolism, Molecular Transport, Small Molecule Biochemistry	Uptake of D-glucose	0.0017	FGFR2,LIPE,PTPRF,SLC1A3,SLC5A1	5
Cancer, Organismal Injury and Abnormalities	Head and neck neoplasia	0.00173	AQP7,CASP2,CUL1,DUOX2,FGFR2,GCKR,HYAL1,KRIT1,KRT24,LUC7L2,MKRN1,MSH6,PIK3R5,PRODH2,PTPRF,RALBP1,RNF38,TBP,TNNT3,VANGL1	20
Cancer, Organismal Injury and Abnormalities	Upper aerodigestive tract carcinoma	0.00175	AQP7,CASP2,CUL1,DUOX2,FGFR2,GCKR,INSL3,KRIT1,LUC7L2,PDE3A,VAT1	11
Lipid Metabolism, Molecular Transport, Small Molecule Biochemistry	Uptake of palmitic acid	0.0018	LIPE,SLC27A6	2
Nervous System Development and Function, Tissue Morphology	Quantity of neurons	0.00182	CASP2,F2,FGFR2,NHLH1,PTPRF,SLC1A3	6
Cancer, Organismal Injury and Abnormalities, Reproductive System Disease	Endometrioid endometrial adenocarcinoma	0.00186	ABCC2,DUOX2,FGFR2,GLP2R,KRIT1,LUC7L2,MSH6,PPP1R9A,PTPRF,SLC1A3,SLC5A1,TMPRSS3,TNNT3,UBE3C,USH1C	15
Cell Morphology, Cellular Assembly and Organization, Cellular Function and Maintenance	Reorganization of cytoskeleton	0.00188	F2,FGFR2,PTPRF,RND1	4
Organ Morphology	Abnormal morphology of serous gland	0.0019	PAX7	1
Cellular Assembly and Organization	Activation of cytoskeleton	0.0019	F2	1
Developmental Disorder, Hematological Disease, Hereditary Disorder, Organismal Injury and Abnormalities	Alpha-2-plasmin inhibitor deficiency	0.0019	SERPINF2	1
Hereditary Disorder, Immunological Disease, Organismal Injury and Abnormalities	Anaphylotoxin inactivator deficiency	0.0019	CPN1	1
Cardiovascular Disease, Developmental Disorder, Hereditary Disorder, Metabolic Disease, Organismal Injury and Abnormalities	Angiokeratoma corporis diffusum with arteriovenous fistulas	0.0019	KRIT1	1
Connective Tissue Disorders, Developmental Disorder, Hereditary Disorder, Organismal Injury and Abnormalities, Skeletal and Muscular Disorders	Antley-Bixler syndrome without genital anomalies or disordered steroidogenesis	0.0019	FGFR2	1
Developmental Disorder, Hereditary Disorder, Organismal Injury and Abnormalities, Reproductive System Disease	Aplasia or hypoplasia of breasts and/or nipples 2	0.0019	PTPRF	1
Cell Cycle	Arrest in G2/M phase of bladder cancer cell lines	0.0019	HYAL1	1
Cellular Development, Cellular Growth and Proliferation	Arrest in growth of stomach cancer cell lines	0.0019	FGFR2	1
Hereditary Disorder, Neurological Disease, Ophthalmic Disease, Organismal Injury and Abnormalities	Ataxia-oculomotor apraxia 3	0.0019	PIK3R5	1
Connective Tissue Disorders, Developmental Disorder, Hereditary Disorder, Organismal Injury and Abnormalities, Skeletal and Muscular Disorders	Atypical Pfeiffer syndrome	0.0019	FGFR2	1
Connective Tissue Disorders, Developmental Disorder, Hereditary Disorder, Organismal Injury and Abnormalities, Skeletal and Muscular Disorders	Autosomal dominant Apert syndrome	0.0019	FGFR2	1
Connective Tissue Disorders, Dermatological Diseases and Conditions, Developmental Disorder, Hereditary Disorder, Organismal Injury and Abnormalities, Skeletal and Muscular Disorders	Autosomal dominant Beare-Stevenson cutis gyrata syndrome	0.0019	FGFR2	1
Cancer, Cardiovascular Disease, Developmental Disorder, Hereditary Disorder, Neurological Disease, Organismal Injury and Abnormalities	Autosomal dominant cerebral cavernous malformations 1	0.0019	KRIT1	1
Developmental Disorder, Endocrine System Disorders, Hereditary Disorder, Organismal Injury and Abnormalities, Reproductive System Disease	Autosomal dominant cryptorchidism	0.0019	INSL3	1
Auditory Disease, Developmental Disorder, Hereditary Disorder, Neurological Disease, Organismal Injury and Abnormalities	Autosomal recessive autosomal recessive deafness type 8	0.0019	TMPRSS3	1
Connective Tissue Disorders, Developmental Disorder, Hereditary Disorder, Organismal Injury and Abnormalities, Skeletal and Muscular Disorders	Bent bone dysplasia syndrome	0.0019	FGFR2	1
Digestive System Development and Function, Lipid Metabolism, Molecular Transport, Small Molecule Biochemistry	Biliary excretion of leukotriene C4	0.0019	ABCC2	1
Developmental Disorder, Hematological Disease	Bleeding disorder of yolk sac	0.0019	F2	1
Hereditary Disorder, Nutritional Disease, Organismal Injury and Abnormalities	Body mass index quantitative trait locus 17	0.0019	AQP7	1
Cardiovascular Disease, Hereditary Disorder, Organismal Injury and Abnormalities	Brachydactyly hypertension	0.0019	PDE3A	1
Connective Tissue Disorders, Hereditary Disorder, Neurological Disease, Organismal Injury and Abnormalities, Skeletal and Muscular Disorders	Caudal dysplasia sequence	0.0019	VANGL1	1
Cancer, Cardiovascular Disease, Neurological Disease, Ophthalmic Disease, Organismal Injury and Abnormalities	Cavernous malformations of CNS and retina	0.0019	KRIT1	1
Cancer, Gastrointestinal Disease, Organismal Injury and Abnormalities, Reproductive System Disease	Colorectal and endometrial cancer	0.0019	MSH6	1
Cardiovascular Disease, Developmental Disorder, Hematological Disease, Hereditary Disorder, Metabolic Disease, Organismal Injury and Abnormalities	Congenital atransferrinemia	0.0019	TF	1
Nucleic Acid Metabolism, Small Molecule Biochemistry	Consumption of NADH	0.0019	F2	1
Carbohydrate Metabolism, Small Molecule Biochemistry, Vitamin and Mineral Metabolism	Consumption of ascorbic acid	0.0019	F2	1
Developmental Disorder, Hereditary Disorder, Ophthalmic Disease, Organismal Injury and Abnormalities	Coppock-like cataract type 14	0.0019	GJA3	1
Hereditary Disorder, Organismal Injury and Abnormalities	Corticosteroid-binding globulin deficiency	0.0019	SERPINA6	1
Cell-To-Cell Signaling and Interaction	Coupling of epithelial cells	0.0019	GJA3	1
Connective Tissue Disorders, Dermatological Diseases and Conditions, Developmental Disorder, Hereditary Disorder, Organismal Injury and Abnormalities, Skeletal and Muscular Disorders	Craniofacial-skeletal-dermatologic dysplasia	0.0019	FGFR2	1
Cell Death and Survival, Cellular Compromise, Neurological Disease, Tissue Morphology	Degeneration of basket neuron	0.0019	TBP	1
Cellular Development, Skeletal and Muscular System Development and Function, Tissue Development	Delay in initiation of differentiation of quadriceps muscle	0.0019	SSPN	1
Cellular Development, Nervous System Development and Function, Tissue Development	Delay in initiation of maturation of dendritic spines	0.0019	PPP1R9A	1
Cell Morphology, Cellular Assembly and Organization, Cellular Function and Maintenance	Delay in initiation of maturation of filopodia	0.0019	PPP1R9A	1
Nervous System Development and Function	Density of sciatic nerve	0.0019	PTPRF	1
Cellular Compromise	Destruction of basal membrane	0.0019	F2	1
Gastrointestinal Disease, Organismal Injury and Abnormalities	Development of inguinal hernia	0.0019	INSL3	1
Embryonic Development, Organismal Development, Tissue Development	Development of lacrimal bud	0.0019	FGFR2	1
Cardiovascular System Development and Function, Tissue Morphology	Diameter of dorsal aorta	0.0019	KRIT1	1
Cell-To-Cell Signaling and Interaction	Disorganization of neuromuscular junctions	0.0019	PAX7	1
Lipid Metabolism, Small Molecule Biochemistry	Distribution of glucocorticoid	0.0019	SERPINA6	1
Connective Tissue Disorders, Developmental Disorder, Hereditary Disorder, Organismal Injury and Abnormalities, Skeletal and Muscular Disorders	Dwarfism of axial skeleton	0.0019	FGFR2	1
Hematological Disease, Hereditary Disorder, Organismal Injury and Abnormalities	Dysprothrombinemia	0.0019	F2	1
Cancer, Gastrointestinal Disease, Organismal Injury and Abnormalities	Early-onset colorectal cancer	0.0019	MSH6	1
Drug Metabolism, Molecular Transport, Small Molecule Biochemistry	Efflux of vinorelbine	0.0019	RALBP1	1
Hereditary Disorder, Ophthalmic Disease, Organismal Injury and Abnormalities	Embryonal nuclear cataract type 14	0.0019	GJA3	1
Cardiovascular System Development and Function, Tissue Morphology	Enlargement of dorsal aorta	0.0019	KRIT1	1
Hereditary Disorder, Neurological Disease, Organismal Injury and Abnormalities	Episodic ataxia type 6	0.0019	SLC1A3	1
Molecular Transport, Nucleic Acid Metabolism, Small Molecule Biochemistry	Export of bosentan	0.0019	ABCC2	1
Connective Tissue Disorders, Hereditary Disorder, Metabolic Disease, Organismal Injury and Abnormalities	Familial partial lipodystrophy type 6	0.0019	LIPE	1
Connective Tissue Disorders, Developmental Disorder, Hereditary Disorder, Neurological Disease, Organismal Injury and Abnormalities, Skeletal and Muscular Disorders	Familial scaphocephaly syndrome	0.0019	FGFR2	1
Lipid Metabolism, Small Molecule Biochemistry	Formation of 1,2-diacylglycerol	0.0019	F2	1
Cellular Assembly and Organization	Formation of syncytial-lipoid structures	0.0019	LIPE	1
Developmental Disorder, Hereditary Disorder, Metabolic Disease, Organismal Injury and Abnormalities	Glucose-galactose malabsorption	0.0019	SLC5A1	1
Hematological Disease, Hereditary Disorder, Organismal Injury and Abnormalities	Hereditary hypoprothrombinemia	0.0019	F2	1
Cancer, Gastrointestinal Disease, Hereditary Disorder, Metabolic Disease, Organismal Injury and Abnormalities	Hereditary nonpolyposis colorectal cancer type 5	0.0019	MSH6	1
Lipid Metabolism, Small Molecule Biochemistry	Hydrolysis of monooleoyl-2-O-monooleylglycerol	0.0019	LIPE	1
Cancer, Cardiovascular Disease, Developmental Disorder, Neurological Disease, Organismal Injury and Abnormalities	Hyperkeratotic cutaneous capillary-venous malformations associated with cerebral capillary malformations	0.0019	KRIT1	1
Cancer, Organismal Injury and Abnormalities, Reproductive System Disease	Hyperplasia of germ cells	0.0019	CASP2	1
Organ Morphology	Hyperthickening of epidermis	0.0019	FGFR2	1
Cell-To-Cell Signaling and Interaction, Cellular Growth and Proliferation, Hematological System Development and Function, Inflammatory Response	Induction of blood platelets	0.0019	F2	1
Cell-To-Cell Signaling and Interaction, Cellular Growth and Proliferation, Renal and Urological System Development and Function	Induction of mesangial cells	0.0019	F2	1
Gene Expression	Initiation of transcription of chromatin	0.0019	TBP	1
Neurological Disease, Organismal Injury and Abnormalities, Psychological Disorders	Injury of cerebellum	0.0019	SLC1A3	1
Cellular Movement	Invasion by TPC-1 cells	0.0019	FGFR2	1
Cardiovascular Disease, Neurological Disease, Organismal Injury and Abnormalities	Ischemic hemispheric stroke	0.0019	F2	1
Connective Tissue Disorders, Developmental Disorder, Organismal Injury and Abnormalities, Skeletal and Muscular Disorders	Isolated coronal craniosynostosis	0.0019	FGFR2	1
Connective Tissue Disorders, Developmental Disorder, Organismal Injury and Abnormalities, Skeletal and Muscular Disorders	Isolated unicoronal craniosynostosis	0.0019	FGFR2	1
Connective Tissue Development and Function, Connective Tissue Disorders, Organ Morphology, Organismal Development, Organismal Injury and Abnormalities, Skeletal and Muscular Disorders, Skeletal and Muscular System Development and Function, Tissue Development	Lack of pubic bone	0.0019	FGFR2	1
Cardiovascular Disease, Developmental Disorder, Hematological Disease, Hereditary Disorder, Organismal Injury and Abnormalities	Late-onset hereditary sideroblastic anemia	0.0019	ALAS2	1
Developmental Disorder, Hereditary Disorder, Organismal Functions, Organismal Injury and Abnormalities, Skeletal and Muscular Disorders	Limb-girdle muscular dystrophy type 1F	0.0019	TNPO3	1
Cell Death and Survival, Cellular Assembly and Organization	Maturation of apoptotic bodies	0.0019	CASP2	1
Cell Cycle	Mitotic index of tumor cells	0.0019	F2	1
Embryonic Development, Endocrine System Development and Function, Nervous System Development and Function, Organ Development, Organ Morphology, Organismal Development, Tissue Development	Morphogenesis of adenohypophysis	0.0019	DUOX2	1
Developmental Disorder, Hereditary Disorder, Metabolic Disease, Organismal Injury and Abnormalities	Mucopolysaccharidosis IX	0.0019	HYAL1	1
Connective Tissue Disorders, Developmental Disorder, Hereditary Disorder, Organismal Injury and Abnormalities, Skeletal and Muscular Disorders	Nonclassifiable autosomal dominant craniosynostosis	0.0019	FGFR2	1
Auditory Disease, Developmental Disorder, Hereditary Disorder, Neurological Disease, Organismal Injury and Abnormalities	Nonsyndromic recessive deafness (DFNB18)	0.0019	USH1C	1
Developmental Disorder, Hereditary Disorder, Ophthalmic Disease, Organismal Injury and Abnormalities	Nuclear coralliform cataract type 14	0.0019	GJA3	1
Developmental Disorder, Hereditary Disorder, Ophthalmic Disease, Organismal Injury and Abnormalities	Nuclear pulverulent and posterior polar cataract type 14	0.0019	GJA3	1
Nervous System Development and Function, Neurological Disease, Ophthalmic Disease	Optic nerve cupping	0.0019	SLC1A3	1
Connective Tissue Development and Function, Embryonic Development, Organ Development, Organismal Development, Skeletal and Muscular System Development and Function, Tissue Development	Ossification of sphenoid bone	0.0019	FGFR2	1
Cell Morphology	Permeabilization of brush border membrane vesicles	0.0019	AQP7	1
Connective Tissue Disorders, Developmental Disorder, Hereditary Disorder, Organismal Injury and Abnormalities, Skeletal and Muscular Disorders	Pfeiffer syndrome type 3	0.0019	FGFR2	1
RNA Post-Transcriptional Modification	Polyadenylation of reporter mRNA	0.0019	TBP	1
Cellular Function and Maintenance, Reproductive System Development and Function	Progression of oocytes	0.0019	INSL3	1
Cardiovascular Disease, Developmental Disorder, Hematological Disease, Hereditary Disorder, Organismal Injury and Abnormalities	Pyridoxine-refractory X-linked sideroblastic anemia	0.0019	ALAS2	1
Connective Tissue Development and Function, Tissue Morphology	Quantity of adipoblasts	0.0019	LIPE	1
Drug Metabolism, Molecular Transport, Small Molecule Biochemistry	Quantity of vinorelbine	0.0019	RALBP1	1
Organ Morphology, Organismal Functions	Repair of quadriceps muscle	0.0019	SSPN	1
Connective Tissue Disorders, Developmental Disorder, Hereditary Disorder, Neurological Disease, Ophthalmic Disease, Organismal Injury and Abnormalities, Skeletal and Muscular Disorders	Scaphocephaly and Axenfeld-Rieger anomaly	0.0019	FGFR2	1
Molecular Transport	Secretion of polyphosphate	0.0019	F2	1
Developmental Disorder, Organismal Injury and Abnormalities, Renal and Urological Disease, Reproductive System Disease	Severe hypospadia	0.0019	FGFR2	1
Organismal Functions, Skeletal and Muscular Disorders	Severe muscle weakness	0.0019	PAX7	1
Hereditary Disorder, Neurological Disease, Organismal Injury and Abnormalities	Spinocerebellar ataxia 17	0.0019	TBP	1
Hematological System Development and Function, Tissue Morphology	Stimulation of blood	0.0019	F2	1
Hereditary Disorder, Organismal Injury and Abnormalities, Reproductive System Disease	Susceptibility to recurrent pregnancy loss 2	0.0019	F2	1
Connective Tissue Disorders, Organismal Injury and Abnormalities, Skeletal and Muscular Disorders	Synostosis of coronal suture	0.0019	FGFR2	1
Developmental Disorder, Endocrine System Disorders, Hereditary Disorder, Metabolic Disease, Organismal Injury and Abnormalities	Thyroid dyshormonogenesis 6	0.0019	DUOX2	1
Cardiovascular Disease, Hematological Disease, Hereditary Disorder, Metabolic Disease, Organismal Injury and Abnormalities	Transient infantile hypertriglyceridemia	0.0019	GPD1	1
Molecular Transport	Transport of carbamazepine	0.0019	ABCC2	1
Molecular Transport	Transport of toxin peptide	0.0019	ABCC2	1
Auditory Disease, Hereditary Disorder, Neurological Disease, Ophthalmic Disease, Organismal Injury and Abnormalities	Usher syndrome type 1C	0.0019	USH1C	1
Carbohydrate Metabolism	Utilization of glycogen	0.0019	LIPE	1
Reproductive System Development and Function	Vacuolation of seminiferous epithelium	0.0019	LIPE	1
Connective Tissue Disorders, Developmental Disorder, Gastrointestinal Disease, Hereditary Disorder, Organismal Development, Organismal Injury and Abnormalities, Skeletal and Muscular Disorders	Verheij syndrome	0.0019	PUF60	1
Developmental Disorder, Hematological Disease, Hereditary Disorder, Metabolic Disease, Organismal Injury and Abnormalities	X-linked dominant erythropoietic protoporphyria	0.0019	ALAS2	1
Hereditary Disorder, Ophthalmic Disease, Organismal Injury and Abnormalities	Zonular pulverulent cataract 3	0.0019	GJA3	1
Cancer	Cell transformation	0.00196	CASP2,F2,FGFR2,PIK3R5,TBP,VTCN1	6
Cancer, Endocrine System Disorders, Organismal Injury and Abnormalities, Reproductive System Disease	Ovarian adenocarcinoma	0.002	CASP2,F2,FGFR2,KRT24,MSH6,PAX7,PDE3A,PIK3R5,PTPRF,TMPRSS3	10
Cell Death and Survival	Apoptosis	0.00201	AQP7,CASP2,CIDEA,CUL1,F2,FGFR2,GLP2R,HYAL1,INSL3,MSH6,PAX7,PDE3A,PGLYRP1,PTPRF,PUF60,RALBP1,SLC1A3,TBP,TF,VTCN1,ZNF16	21
Cellular Development, Cellular Growth and Proliferation	Formation of multinucleated cells	0.00202	CUL1,LIPE	2
Carbohydrate Metabolism	Accumulation of carbohydrate	0.00206	AQP7,F2,HYAL1,PIK3R5	4
Connective Tissue Disorders, Organismal Injury and Abnormalities, Skeletal and Muscular Disorders	Non-traumatic arthropathy	0.00209	ABCC2,ALAS2,FGB,HYAL1,INSL3,PGLYRP1,SLC1A3,TF,VTCN1	9
Organismal Injury and Abnormalities	Fibrin clot	0.00214	F2,FGB	2
Nutritional Disease	Undernutrition	0.00214	FGFR2,PDE3A	2
Molecular Transport	Transport of molecule	0.00223	ABCC2,ALAS2,AQP7,CIDEA,F2,FGB,GCKR,GLP2R,LIPE,RALBP1,SERPINA6,SLC1A3,SLC5A1,TF	14
Embryonic Development, Nervous System Development and Function, Organ Development, Organismal Development, Tissue Development, Visual System Development and Function	Formation of lens	0.00226	GJA3,RALBP1	2
Cancer, Organismal Injury and Abnormalities, Reproductive System Disease	Endometrial carcinoma	0.00227	ABCC2,CIDEA,DUOX2,FGFR2,GLP2R,KRIT1,LUC7L2,MSH6,PPP1R9A,PTPRF,SLC1A3,SLC5A1,TMPRSS3,TNNT3,UBE3C,USH1C	16
Cell Morphology, Tissue Morphology	Morphology of connective tissue cells	0.00229	AQP7,CIDEA,F2,HYAL1,LIPE	5
Cellular Assembly and Organization, Cellular Function and Maintenance	Organization of actin filaments	0.00241	PPP1R9A,RND1,TF	3
Hereditary Disorder, Neurological Disease, Organismal Injury and Abnormalities	Spinocerebellar ataxia	0.00246	ALAS2,SLC1A3,TBP	3
Cellular Assembly and Organization, Cellular Function and Maintenance	Organization of filaments	0.00258	PPP1R9A,RND1,SERPINF2,TF	4
Cell Morphology, Endocrine System Disorders, Organ Morphology, Organismal Development, Organismal Injury and Abnormalities, Reproductive System Development and Function, Reproductive System Disease	Abnormal morphology of oocytes	0.00263	AMBP,CASP2	2
Cancer, Organismal Injury and Abnormalities, Skeletal and Muscular Disorders	Muscle tumor	0.00265	CASP2,FGFR2,HYAL1,LIPE,PAX7,TNPO3,UBE3C	7
Cancer, Organismal Injury and Abnormalities, Reproductive System Disease	Breast carcinoma	0.00277	ABCC2,CACNA1I,CASP2,FGFR2,LIPE,PRODH2,PTPRF,RAB5C,RALBP1,SLC5A1,SSPN,TF,TNNT3,VANGL1	14
Cell Death and Survival	Cell death	0.00292	AQP7,CASP2,CIDEA,CUL1,F2,FGFR2,GLP2R,HYAL1,INSL3,LIPE,MSH6,PAX7,PDE3A,PGLYRP1,PPP1R9A,PTPRF,PUF60,RALBP1,SERPINA4,SERPINF2,SLC1A3,TBP,TF,VTCN1,ZNF16	25
Organismal Development	Growth of vessel	0.00293	F2,PTPRF,RND1,TF	4
Cancer, Organismal Injury and Abnormalities, Respiratory Disease	Respiratory system tumor	0.00298	ABCC2,AQP7,CUL1,DUOX2,F2,FGB,FGFR2,GCKR,KRIT1,LUC7L2,MSH6,PF4V1,SERPINA4,SLC27A6,TBP,VTCN1	16
Embryonic Development, Organ Development, Organ Morphology, Organismal Development, Organismal Injury and Abnormalities, Reproductive System Development and Function, Reproductive System Disease, Tissue Development	Abnormal morphology of mammary gland	0.00304	FGFR2,PTPRF	2
Organ Development, Visual System Development and Function	Growth of eye	0.00304	F2,GJA3	2
Vitamin and Mineral Metabolism	Quantity of fat-soluble vitamin	0.00304	FGFR2,LIPE	2
Cancer, Organismal Injury and Abnormalities, Skeletal and Muscular Disorders	Muscle cancer	0.00318	CASP2,FGFR2	2
Cardiovascular System Development and Function, Organismal Development	Growth of blood vessel	0.00328	F2,RND1,TF	3
Cancer, Endocrine System Disorders, Organismal Injury and Abnormalities, Reproductive System Disease	Ovarian endometrioid carcinoma	0.0033	CASP2,FGFR2,KRT24,MSH6,PAX7,PDE3A,PIK3R5,PTPRF	8
Connective Tissue Development and Function, Tissue Morphology	Quantity of adipocytes	0.00332	CIDEA,LIPE	2
Cancer, Gastrointestinal Disease, Hepatic System Disease, Organismal Injury and Abnormalities	Cholangiocarcinoma	0.00334	AMBP,FGFR2,SERPINA6	3
Vitamin and Mineral Metabolism	Quantity of vitamin	0.00334	ABCC2,FGFR2,LIPE	3
Embryonic Development, Endocrine System Development and Function, Organ Development, Organismal Development, Tissue Development	Development of pituitary gland	0.00347	DUOX2,FGFR2	2
Carbohydrate Metabolism, Molecular Transport, Small Molecule Biochemistry	Concentration of glycerol	0.00377	AQP7,LIPE	2
Auditory Disease, Auditory and Vestibular System Development and Function, Cell Morphology, Organ Morphology, Organismal Development, Organismal Injury and Abnormalities	Abnormal morphology of cochlear hair cell inter-stereocilial links	0.00379	USH1C	1
Organismal Injury and Abnormalities, Renal and Urological Disease, Renal and Urological System Development and Function	Abnormal morphology of urethra	0.00379	FGFR2	1
Carbohydrate Metabolism, Small Molecule Biochemistry	Accumulation of glycerol	0.00379	AQP7	1
Cardiovascular Disease, Hematological Disease, Organismal Injury and Abnormalities	Accumulation of thrombus	0.00379	F2	1
Hematological System Development and Function	Activated partial thromboplastin time of plasma	0.00379	F2	1
Connective Tissue Disorders, Developmental Disorder, Hereditary Disorder, Organismal Injury and Abnormalities, Skeletal and Muscular Disorders	Autosomal dominant Jackson-Weiss syndrome	0.00379	FGFR2	1
Connective Tissue Disorders, Developmental Disorder, Hereditary Disorder, Organismal Injury and Abnormalities, Skeletal and Muscular Disorders	Autosomal dominant Pfeiffer syndrome	0.00379	FGFR2	1
Connective Tissue Disorders, Developmental Disorder, Hereditary Disorder, Organismal Injury and Abnormalities, Skeletal and Muscular Disorders	Autosomal dominant saethre-chotzen syndrome	0.00379	FGFR2	1
Developmental Disorder, Endocrine System Disorders, Organismal Injury and Abnormalities, Reproductive System Disease	Bilateral cryptorchidism	0.00379	INSL3	1
Gastrointestinal Disease, Organismal Injury and Abnormalities	Bilateral inguinal hernia	0.00379	INSL3	1
Carbohydrate Metabolism, Drug Metabolism, Small Molecule Biochemistry	Breakdown of hyaluronic acid	0.00379	HYAL1	1
Gastrointestinal Disease, Organismal Injury and Abnormalities	Cecal atresia	0.00379	FGFR2	1
Cell Morphology, Nervous System Development and Function	Cell rounding of astrocytes	0.00379	F2	1
Cell Morphology	Cell rounding of neurons	0.00379	F2	1
Cell-To-Cell Signaling and Interaction, Cellular Assembly and Organization	Cell-cell contact of blood platelets	0.00379	F2	1
Cardiovascular Disease, Hematological Disease, Organismal Injury and Abnormalities	Central venous catheter-associated thrombosis	0.00379	F2	1
Amino Acid Metabolism, Small Molecule Biochemistry	Cleavage of L-lysine	0.00379	CPN1	1
Drug Metabolism, Molecular Transport	Co-transport of glutathione	0.00379	ABCC2	1
Cell Morphology	Contraction of carcinoma cell lines	0.00379	F2	1
Cancer, Cell-To-Cell Signaling and Interaction, Inflammatory Response, Organismal Injury and Abnormalities, Tumor Morphology	Cytotoxic reaction of non-small-cell lung cancer cells	0.00379	RALBP1	1
Cancer, Cell-To-Cell Signaling and Interaction, Inflammatory Response, Organismal Injury and Abnormalities, Tumor Morphology	Cytotoxic reaction of small cell lung cancer cells	0.00379	RALBP1	1
Cancer, Cellular Compromise, Organismal Injury and Abnormalities	Damage of thymic lymphoma cells	0.00379	CASP2	1
Cell Death and Survival	Delay in apoptosis of pheochromocytoma cell lines	0.00379	CASP2	1
Cell Cycle	Delay in mitosis of stem cells	0.00379	PAX7	1
Cell-To-Cell Signaling and Interaction, Neurological Disease	Detachment of growth cone	0.00379	F2	1
Embryonic Development, Organismal Development, Tissue Development	Development of mammary placode 4	0.00379	FGFR2	1
Developmental Disorder, Gastrointestinal Disease, Hepatic System Disease, Hereditary Disorder, Liver Hyperbilirubinemia, Metabolic Disease, Organismal Injury and Abnormalities	Dubin-Johnson syndrome	0.00379	ABCC2	1
Cardiac Arrythmia, Cardiovascular Disease, Organismal Injury and Abnormalities	Variation QT syndrome	0.00379	NHLH1	1
Gastrointestinal Disease, Hepatic System Disease, Liver Steatosis, Metabolic Disease, Organismal Injury and Abnormalities	Hepatic steatosis	0.004	CIDEA,FGFR2,GPD1,LIPE,PDE3A	5
Cardiac Dilation, Cardiovascular System Development and Function, Organ Morphology	Dilation of right ventricle	0.00568	SERPINF2	1
Increased Levels of Bilirubin, Small Molecule Biochemistry	Increased excretion of bilirubin	0.00756	ABCC2	1
Cardiac Pulmonary Embolism, Cardiovascular Disease, Organismal Injury and Abnormalities, Respiratory Disease	Recurrent pulmonary embolism	0.00945	F2	1
Cardiac Infarction, Cardiovascular Disease, Organismal Injury and Abnormalities, Skeletal and Muscular Disorders	Non-Q wave myocardial infarction	0.0113	F2	1
Gastrointestinal Disease, Hepatic System Disease, Liver Cholestasis	Obstructive cholestasis	0.0132	ABCC2	1
Cardiovascular System Development and Function, Cellular Development, Cellular Growth and Proliferation, Connective Tissue Development and Function, Digestive System Development and Function, Hepatic System Development and Function, Liver Fibrosis, Liver Proliferation, Organ Development, Organismal Development, Tissue Development	Proliferation of hepatic stellate cells	0.0133	F2,TF	2
Cell Cycle, Connective Tissue Development and Function, Hepatic System Development and Function, Liver Fibrosis	Mitogenesis of hepatic stellate cells	0.0151	F2	1
Organismal Injury and Abnormalities, Renal Damage, Renal and Urological Disease	Acute kidney injury	0.0158	AMBP,PDE3A	2
Cellular Development, Cellular Growth and Proliferation, Renal Proliferation, Renal and Urological System Development and Function	Cell proliferation of kidney cell lines	0.0181	CCNH,FGFR2,VTCN1	3
Cardiac Arrythmia, Cardiovascular Disease, Organismal Injury and Abnormalities	Ventricular extrasystole	0.0207	NHLH1	1
Cellular Development, Cellular Growth and Proliferation, Digestive System Development and Function, Hepatic System Development and Function, Liver Proliferation, Organ Development	Proliferation of liver cells	0.0262	F2,FGFR2,TF	3
Cancer, Gastrointestinal Disease, Hepatic System Disease, Liver Hyperplasia/Hyperproliferation, Organismal Injury and Abnormalities	Symptomatic stage iodine-refractory liver metastasis	0.0299	FGFR2	1
Digestive System Development and Function, Gastrointestinal Disease, Hepatic System Development and Function, Hepatic System Disease, Inflammatory Disease, Inflammatory Response, Liver Inflammation/Hepatitis, Organ Development, Organismal Injury and Abnormalities, Psychological Disorders	Acute alcoholic hepatitis	0.0391	PDE3A	1
Cancer, Gastrointestinal Disease, Hepatic System Disease, Liver Hyperplasia/Hyperproliferation, Organismal Injury and Abnormalities, Tumor Morphology	Progressive liver metastasis	0.0391	FGFR2	1
Gastrointestinal Disease, Hepatic System Disease, Liver Cirrhosis, Organismal Injury and Abnormalities	Compensated cirrhosis	0.0427	TF	1
Cell Death and Survival, Organismal Injury and Abnormalities, Renal Necrosis/Cell Death, Renal and Urological Disease	Apoptosis of kidney cell lines	0.0443	CASP2,F2,GLP2R	3
Digestive System Development and Function, Gastrointestinal Disease, Hepatic System Development and Function, Hepatic System Disease, Inflammatory Disease, Inflammatory Response, Liver Inflammation/Hepatitis, Organ Development, Organismal Injury and Abnormalities, Psychological Disorders	Severe alcoholic hepatitis	0.0445	PDE3A	1
Cancer, Gastrointestinal Disease, Hepatic System Disease, Hepatocellular Carcinoma, Liver Hyperplasia/Hyperproliferation, Organismal Injury and Abnormalities	Hepatocellular carcinoma	0.0481	AQP7,CASP2,F2,FGFR2,PAX7,TBP	6
