# Supplementary material for: Practical biomarkers and robust multiplex models for the prediction of response to promising first-line chemotherapy: A theranostic study in metastatic ovarian cancer patients with residual peritoneal tumors
Source: Research Square preprint supplement (doi:10.21203/rs.3.rs-2465306/v1), 2023-01-12
Supplement: Supplementary file 2 [file 31281b6c02450b8d3560d2aa.xlsx]

## Sheet: Annotation_protein correl 0.05
Supplementary Table_S5. Genes highly correlated with protein in the expression levels
Gene symbol	mRNA-Protein expression correlation		Entrez Gene Name	Location	Type(s)	Biomarker Application(s)	Biological Function(s)
	Pearson_r	Pearson_p
VTCN1	0.786	9.20409e-38	V-set domain containing T cell activation inhibitor 1	Plasma Membrane	other		This gene encodes a protein belonging to the B7 costimulatory protein family. Proteins in this family are present on the surface of antigen-presenting cells and interact with ligand bound to receptors on the surface of T cells. Studies have shown that high levels of the encoded protein has been correlated with tumor progression.
MSH6	0.745	4.63737e-32	mutS homolog 6	Nucleus	enzyme		This gene encodes a member of the DNA mismatch repair MutS family. In E. coli, the MutS protein helps in the recognition of mismatched nucleotides prior to their repair. A highly conserved region of approximately 150 aa, called the Walker-A adenine nucleotide binding motif, exists in MutS homologs. The encoded protein heterodimerizes with MSH2 to form a mismatch recognition complex that functions…
VAT1	0.674	2.14594e-24	vesicle amine transport 1	Plasma Membrane	transporter		Synaptic vesicles are responsible for regulating the storage and release of neurotransmitters in the nerve terminal. The protein encoded by this gene is an abundant integral membrane protein of cholinergic synaptic vesicles and is thought to be involved in vesicular transport. It belongs to the quinone oxidoreductase subfamily of zinc-containing alcohol dehydrogenase proteins.
CUL1	0.607	6.78112e-19	cullin 1	Nucleus	enzyme		APC/C-mediated degradation of cell cycle proteins, organism-specific biosystem (from REACTOME), Class I MHC mediated antigen processing & presentation, organism-specific biosystem (from REACTOME),Cell Cycle, Mitotic, organism-specific biosystem (from REACTOME), etc.
UBE3C	0.584	2.71273e-17	ubiquitin protein ligase E3C	Nucleus	enzyme		Adaptive Immune System, organism-specific biosystem (from REACTOME),Antigen processing: Ubiquitination & Proteasome degradation, organism-specific biosystem (from REACTOME), etc.
SLC5A1	0.58	5.00348e-17	solute carrier family 5 member 1	Plasma Membrane	transporter		This gene encodes a member of the sodium-dependent glucose transporter (SGLT) family. The encoded integral membrane protein is the primary mediator of dietary glucose and galactose uptake from the intestinal lumen. Metabolism of carbohydrates, organism-specific biosystem (from REACTOME)
PUF60	0.573	1.43183e-16	poly(U) binding splicing factor 60	Nucleus	other		This gene encodes a nucleic acid-binding protein that plays a role in a variety of nuclear processes, including pre-mRNA splicing and transcriptional regulation. The encoded protein forms a complex with the far upstream DNA element (FUSE) and FUSE-binding protein at the myelocytomatosis oncogene (MYC) promoter. This complex represses MYC transcription through the core-TFIIH basal transcription fa…
GPD1	0.493	4.82024e-12	glycerol-3-phosphate dehydrogenase 1	Cytoplasm	enzyme	unspecified application	plays a critical role in carbohydrate and lipid metabolism.
LIPE	0.471	5.42056e-11	lipase E, hormone sensitive type	Cytoplasm	enzyme		The protein encoded by this gene has a long and a short form, generated by use of alternative translational start codons. The long form is expressed in steroidogenic tissues such as testis, where it converts cholesteryl esters to free cholesterol for steroid hormone production. The short form is expressed in adipose tissue, among others, where it hydrolyzes stored triglycerides to free fatty acid…
PTPRF	0.465	1.01843e-10	protein tyrosine phosphatase, receptor type F	Plasma Membrane	phosphatase		The protein encoded by this gene is a member of the protein tyrosine phosphatase (PTP) family. PTPs are known to be signaling molecules that regulate a variety of cellular processes including cell growth, differentiation, mitotic cycle, and oncogenic transformation. This PTP was shown to function in the regulation of epithelial cell-cell contacts at adherents junctions, as well as in the control …
PAXIP1	0.453	3.46748e-10	PAX interacting protein 1	Nucleus	other		This gene is a member of the paired box (PAX) gene family and encodes a nuclear protein with six BRCT (breast cancer carboxy-terminal) domains. This protein plays a critical role in maintaining genome stability, condensation of chromatin and progression through mitosis.
RAB5C	0.432	2.64753e-09	RAB5C, member RAS oncogene family	Cytoplasm	enzyme		Members of the Rab protein family are small GTPases of the Ras superfamily that are thought to ensure fidelity in the process of docking and/or fusion of vesicles with their correct acceptor compartment.
CASP2	0.429	3.50042e-09	caspase 2	Cytoplasm	peptidase		This gene encodes a member of the cysteine-aspartic acid protease (caspase) family. Caspases mediate cellular apoptosis through the proteolytic cleavage of specific protein substrates. The encoded protein may function in stress-induced cell death pathways, cell cycle maintenance, and the suppression of tumorigenesis. Increased expression of this gene may play a role in neurodegenerative disorders…
PPP1R9A	0.429	3.50042e-09	protein phosphatase 1 regulatory subunit 9A	Plasma Membrane	other		This gene is imprinted, and located in a cluster of imprinted genes on chromosome 7q12. This gene is transcribed in both neuronal and multiple embryonic tissues, and it is maternally expressed mainly in embryonic skeletal muscle tissues and biallelically expressed in other embryonic tissues. The protein encoded by this gene includes a PDZ domain and a sterile alpha motif (SAM). It is a regulatory…
TBP	0.356	1.42837e-06	TATA-box binding protein	Nucleus	transcription regulator		Initiation of transcription by RNA polymerase II requires the activities of more than 70 polypeptides. The protein that coordinates these activities is transcription factor IID (TFIID), which binds to the core promoter to position the polymerase properly, serves as the scaffold for assembly of the remainder of the transcription complex, and acts as a channel for regulatory signals. TAFs may parti…
PGLYRP1	0.295	7.7639e-05	peptidoglycan recognition protein 1	Plasma Membrane	transmembrane receptor		Antimicrobial peptides, organism-specific biosystem (from REACTOME),Immune System, organism-specific biosystem (from REACTOME),Neutrophil degranulation, organism-specific biosystem (from REACTOME)
PDE3A	0.273	0.000267765	phosphodiesterase 3A	Cytoplasm	enzyme		hydrolyze both cAMP and cGMP, and play critical roles in many cellular processes.
CCNH	0.26	0.000530831	cyclin H	Nucleus	transcription regulator		The protein encoded by this gene belongs to the highly conserved cyclin family, whose members are characterized by a dramatic periodicity in protein abundance through the cell cycle. Cyclins function as regulators of CDK kinases. This cyclin forms a complex with CDK7 kinase and ring finger protein MAT1. The kinase complex is able to phosphorylate CDK2 and CDC2 kinases, thus functions as a CDK-act…
TNPO3	0.216	0.0042022	transportin 3	Cytoplasm	other		nuclear import receptor for serine/arginine-rich (SR) proteins such as the splicing factors SFRS1 and SFRS2.
VANGL1	0.214	0.00457639	VANGL planar cell polarity protein 1	Cytoplasm	other		encodes a member of the tretraspanin family. act as a planar cell polarity protein via Wnt signaling pathway.
NXT2	0.208	0.00588501	nuclear transport factor 2 like export factor 2	Nucleus	transporter		plays an important role in the trafficking of macromolecules, ions, and small molecules between the cytoplasm and nucleus.
KRIT1	0.167	0.0276304	KRIT1, ankyrin repeat containing	Plasma Membrane	other		plays a critical role in beta1-integrin-mediated cell proliferation. It associates with junction proteins and RAS-related protein 1A (Rap1A), which requires the encoded protein for maintaining the integrity of endothelial junctions. It is also a microtubule-associated protein and may play a role in microtubule targeting.
