# Supplementary material for: Practical biomarkers and robust multiplex models for the prediction of response to promising first-line chemotherapy: A theranostic study in metastatic ovarian cancer patients with residual peritoneal tumors
Source: Research Square preprint supplement (doi:10.21203/rs.3.rs-2465306/v1), 2023-01-12
Supplement: Supplementary file 3 [file 38dda07d30823b09fd89495c.xlsx]

## Sheet: sheet1
Supplemetary Table S2. Primer sets used in genotyping
Gene_symbol	rs No.	Polymorphism Name	Alleles	Nucleotide Change	Protein Change	Design Strand	Context Sequence
ABCB1	rs1045642	*2	A>G	NM_001348945.2:c.3645T>C	NP_001335874.1:p.Ile1215=	Forward	TGTTGGCCTCCTTTGCTGCCCTCAC[A/G]ATCTCTTCCTGTGACACCACCCGGC
ABCB1	rs1128503	*2	A>G	NM_001348945.2:c.1446T>C	NP_001335874.1:p.Gly482=	Forward	GCCCACTCTGCACCTTCAGGTTCAG[A/G]CCCTTCAAGATCTACCAGGACGAGT
ABCB1	rs2032582	*10 group	A>T	NM_001348945.2:c.2887T>A	NP_001335874.1:p.Ser963Thr	Forward	TATTTAGTTTGACTCACCTTCCCAG[A/T]ACCTTCTAGTTCTTTCTTATCTTTC
ABCB1	rs2032582	*2 group	A>C	NM_001348945.2:c.2887T>G	NP_001335874.1:p.Ser963Ala	Forward	TATTTAGTTTGACTCACCTTCCCAG[A/C]ACCTTCTAGTTCTTTCTTATCTTTC
ABCB1	rs3213619		A>G	NM_001348945.2:c.134-52T>C		Forward	CTTCTTTGAGCTTGGAAGAGCCGCT[A/G]CTCGAATGAGCTCAGGCTTCCTGTG
ABCC1	rs4148356		G>A	NM_004996.4:c.2168G>A	NP_004987.2:p.Arg723Gln	Forward	GCCTGGATTCAGAATGATTCTCTCC[A/G]AGAAAACATCCTTTTTGGATGTCAG
ABCC1	rs60782127		G>T	NM_004996.4:c.1299G>T	NP_004987.2:p.Arg433Ser	Forward	ACCTCATGTCTGTGGACGCTCAGAG[G/T]TTCATGGACTTGGCCACGTACATTA
ABCC2	rs3740066	*1G	C>T	NM_000392.5:c.3972C>T	NP_000383.2:p.Ile1324=	Reverse	TCCTCAGAGGGATCACTTGTGACAT[C/T]GGTAGCATGGAGAAGGTAGGTGGAG
CYP1B1	rs1056836	CYP1B1*3	G>C	NM_000104.4:c.1294C>G	NP_000095.2:p.Leu432Val	Reverse	AAGTTCTCCGGGTTAGGCCACTTCA[C/G]TGGGTCATGATTCACAGACCACTGG
CYP2C8	rs10509681	CYP2C8*3	T>C	NM_000770.3:c.1196A>G	NP_000761.3:p.Lys399Arg	Reverse	AAAGATATTTGGATTAGGAAATTCT[C/T]TGTCATCATGTAGCACGGAAGTCAG
CYP2C8	rs1058930	CYP2C8*4	G>C	NM_000770.3:c.792C>G	NP_000761.3:p.Ile264Met	Reverse	GCTCCATTTTGATCAGGAAGCAATC[C/G]ATAAAGTCCCGAGGATTGTTAACAT
CYP2C8	rs11572080	CYP2C8*3	C>T	NM_000770.3:c.416G>A	NP_000761.3:p.Arg139Lys	Forward	CTCTTGAACACGGTCCTCAATGCTC[C/T]TCTTCCCCATCCCAAAATTCCGCAA
CYP3A4	rs12721627	CYP3A4*16A,*16B	G>C	NM_017460.6:c.554C>G	NP_059488.2:p.Thr185Ser	Reverse	GATGTTCACTCCAAATGATGTGCTA[C/G]TGATCACATCCATGCTGTAGGCCCC
CYP3A4	rs4646438	CYP3A4*6	dupT	NM_017460.6:c.830dup	NP_059488.2:p.Asp277fs	Forward	CTCAGTTTCTTTTGAATTCTGAGAG[-/T]TCAATCATCAGCTGAAGGAAATCCA
CYP3A4	rs55785340	CYP3A4*2	A>G	NM_017460.6:c.664T>C	NP_059488.2:p.Ser222Pro	Forward	GAAATAGTAGTCCACATACTTATTG[A/G]GAGAAAGAATGGATCCAAAAAATCA
CYP3A4	rs55901263	CYP3A4*5	G>C	NM_017460.6:c.653C>G	NP_059488.2:p.Pro218Arg	Reverse	CCACATACTTATTGAGAGAAAGAAT[C/G]GATCCAAAAAATCAAATCTTAAAAG
CYP3A4	rs55951658	CYP3A4*4	T>C	NM_017460.6:c.352A>G	NP_059488.2:p.Ile118Val	Reverse	CATTCTTCATCCTCAGCTATAGAGA[C/T]GGCACTTTTCATAAATCCCACTGGA
CYP3A5	rs10264272	CYP3A5*6	C>T	NM_000777.5:c.624G>A	NP_000768.1:p.Lys208=	Reverse	CTAAGAAACCAAATTTTAGGAACTT[C/T]TTAGTGCTCTCCACAAAGGGGTCTT
CYP3A5	rs776746	CYP3A5*1	T>C	NM_000777.5:c.219-237A>G		Reverse	ATGTGGTCCAAACAGGGAAGAGATA[C/T]TGAAAGACAAAAGAGCTCTTTAAAG
ERCC1	rs11615		A>G	NM_202001.3:c.354T>C	NP_001356337.1:p.Asn118=	Reverse	TTACGTCGCCAAATTCCCAGGGCAC[A/G]TTGCGCACGAACTTCAGTACGGGAT
ERCC1	rs3212986		C>A	NM_202001.3:c. (Genic Downstream Transcript Variant)		Reverse	CACAGGCCGGGACAAGAAGCGGAAG[A/C]AGCAGCAGCAGCAGCCTGTGTAGTC
ERCC2	rs13181		T>G	NM_000400.4:c.2251A>C	NP_000391.1:p.Lys751Gln	Forward	TGCTGAGCAATCTGCTCTATCCTCT[G/T]CAGCGTCTCCTCTGATTCTAGCTGC
ERCC2	rs1799793		C>T	NM_000400.4:c.934G>A	NP_000391.1:p.Asp312Asn	Reverse	CGGGGCTCACCCTGCAGCACTTCGT[C/T]GGGCAGCACGGGGTTGGCCAGGTGG
GSTM1	Null	Null	Null	Null	Null		GAACTCCCTGAAAAGCTAAAGC/CCACCGTATATTTGAGCCCAAC (Ref.21)
GSTP1	rs1695	GSTP1*B	A>G	NM_000852.4:c.313A>G	NP_000843.1:p.Ile105Val	Forward	CGTGGAGGACCTCCGCTGCAAATAC[A/G]TCTCCCTCATCTACACCAACTATGT
GSTT1	Null	Null	Null	Null	Null		TTCCTTACTGGTCCTCACATCTC/TGCTGGCCATGATCCGGTGA (Ref.21,22)
UGT1A1	rs34993780	UGT1A1*7	T>G	NM_000463.3:c.1456T>G	NP_000454.1:p.Tyr486Asp	Forward	AGCCCACGACCTCACCTGGTACCAG[G/T]ACCATTCCTTGGACGTGATTGGTTT
UGT1A1	rs4148323	UGT1A1*6	G>A	NM_000463.3:c.211G>A	NP_000454.1:p.Gly71Arg	Forward	TGACGCCTCGTTGTACATCAGAGAC[A/G]GAGCATTTTACACCTTGAAGACGTA
XRCC1	rs1799782		G>A	NM_006297.3:c.580C>T	NP_006288.2:p.Arg194Trp	Forward	CCTACCCTTGGACCTGGCTCCAAGA[A/G]CCCAGGACCACAGAATTCTCTGGCT
XRCC1	rs25487		T>C	NM_006297.3:c.1196A>G	NP_006288.2:p.Gln399Arg	Reverse	GGGTTGGCGTGTGAGGCCTTACCTC[C/T]GGGAGGGCAGCCGCCGACGCATGCG
XRCC3	rs861539		G>A	NM_001100119.2:c.722C>T	NP_005423.1:p.Thr241Met	Forward	GAAGGCACTGCTCAGCTCACGCAGC[A/G]TGGCCCCCAGGGACTGCAGATGCCT
Referenced to dbSNP database (https://www.ncbi.nlm.nih.gov/snp/), Build 155
