# Supplementary material for: Practical biomarkers and robust multiplex models for the prediction of response to promising first-line chemotherapy: A theranostic study in metastatic ovarian cancer patients with residual peritoneal tumors
Source: Research Square preprint supplement (doi:10.21203/rs.3.rs-2465306/v1), 2023-01-12
Supplement: Supplementary file 4 [file 6bf1b08891c3535baf69174b.xlsx]

## Sheet: Sheet1
Supplementary Table S1. Primer sets used in real-time PCR analysis
Gene symbol	UPL No.	Forward primer sequence	Reverse primer sequence
ABCC2	1	AGCATGCTTCCCATGATGA	TCTAGCCGCTCTGTGGAAAC
ATP7A	72	TGAATTTTGAAATTGTGGAAACC	TCGTTTCTGTTCGGGAGATAC
ATP7B	82	ACCTGGTTGGGATACCCATT	GGGATGAGAGCACCACAGA
BCL2	75	AGTACCTGAACCGGCACCT	GGCCGTACAGTTCCACAAA
ARMCX3	69	TAATCGGTGGAGGTCGATTT	CCACTCCCAACAATCTTTCC
BTN3A2	22	TCCAAGATGGTGACTTCTATGAAA	CCTCATAACCCTTCACTTCGAC
ERCC2	6	GGCCTCCTGGTATGAGCA	CCTGGGTCTCAATAAAGAGCA
MYO5C	65	GCAAGGAGGAGGTATCGAAAG	CCCGTGCGTATTTCTGTAGG
PLEK2	46	GAGAGTGACCCCTCCCAAG	TTGAGTCTTCAGCTTAATGAGGAG
PRSS11	9	AGTCCCATGACCGACAGG	GAGTGACATCATTCGGATACCA
SPINK1	47	CCTTGGCCCTGTTGAGTCTA	CATTGTAACATTTGGCCTCTCTT
TNFSF13B	1	GGGACTGAAAATCTTTGAACCA	GCAAGCAGTCTTGAGTGACTGT
NELL2	47	AAGAACTGCACATGCCTGAA	TCAGGATTTGGGCAGATTAGA
TUBB3	78	GCAACTACGTGGGCGACT	CGAGGCACGTACTTGTGAGA
VEGF	2	CGCAAGAAATCCCGGTATAA	AAATGCTTTCTCCGCTCTGA
XRCC1	81	CCTCCAGGCTTCTAGTGCTG	TCCTCTTCCCTTTGGGAGAC
AURKA	80	CAGGCAACCAGTGTACCTCA	GCCAGTTCCTCCTCAGGATT
HSPC244	53	GGAATTGAAGTAATTCGCCTGT	GCTAATACTGAGCGGCATCTTT
IRF9	89	ATGCAGGCAAGCAGGACTT	TCCTGTGTCCCCCTCCTTAT
DISP1	16	TGTGCAATGTAGATAATTCCAGGAT	CGATGTAGTTTCCCAGTGTCC
GBP1	41	ACTATGAGGAACCGAGGAAGG	TCTGGAGAATTGCATCAGTCAT
HS3ST4	7	GGCACCTGCTGTCTAAACCT	CACTCAGCCACAAAGTGCAT
MTA1	54	GGCAGACATCACCGACTTG	ACACCTGGGTCTCCAACCT
HSPB9	27	GTCCAACCTGAGTCCTACCG	CACACACTGGCCTCTGACC
JOSD2	57	TCTGCAGCAGCAGCTCTTTA	GCTGCGATGAGGGTTCAG
PHF20	35	GGGAAAGTGAAAGCATTGGA	CATCATCACTCCAGAGAAAGCTC
PPFIA1	15	CTGCGAGATGAGCCTTCC	TTGCCAAGACACTAGCTTGC
SCARB2	82	CAGTTCTATTTCTTCAATGTCACCA	AATATTTGCTTTGTTTCTGAGTTCC
ATP5G1	16	TTGTACCAGGGGTCTAATCAGG	TGGAGTGGGAAGTTGCTGT
IL6	40	GATGAGTACAAAAGTCCTGATCCA	CTGCAGCCACTGGTTCTGT
ABCB1	21	ACAGAAAGCGAAGCAGTGGT	ATGGTGGTCCGACCTTTTC
ERCC1	15	CGGACCTCCTGATGGAGA	CACGGTGGTCAGACATTCAG
IFIT3	80	TTTTCGGAACAGCAGAGACA	ATGGCATTTCAGCTGTGGA
CSAG2	77	CCATAGCGGGACCACAAG	CTGGCTGTCCGAAGAGAGAC
FOXO1	30	TCAAGACAACGACACATAGCTG	CAGTTCCTGCTGTCAGACAATC
CISD1	3	CAGTTCCAGCGTACGAGTTG	TTTGTAAGCTAGATAACCAATTGCAG
DDX58	45	AATCTGGAGGAACTGGAGCA	CGCTAATCCGTGATTCCACT
TTC27	29	TGGGAAGATGTTGTCATTTGTT	TTTCTCCAGCTCTTGTCTAAGGA
NDE1	78	AGACCAATTGCAGAAATACATCAG	AAAGTCTTCGAGAGACATGATCG
SLC25A39	65	AAGGTTCGCCTGCAGTCTC	CAATACAGGAGGCACTTCCAT
TNNT3	68	GGAGAAACCGAGACCCAAAC	CTGACGCTTCTTCTGGATGTC
