# Supplementary material for: Practical biomarkers and robust multiplex models for the prediction of response to promising first-line chemotherapy: A theranostic study in metastatic ovarian cancer patients with residual peritoneal tumors
Source: Research Square preprint supplement (doi:10.21203/rs.3.rs-2465306/v1), 2023-01-12
Supplement: Supplementary file 5 [file 785e7b612611d315d9e2eebb.xlsx]

## Sheet: Sheet1
Supplementary Table S3. Candidate genes selected in the 1st screening to compose novel prediction models
		ddTCip cohort		TCGA cohort
Gene symbol	Description	Slope	Slope p-value	Slope	Slope p-value
TF	transferrin	-0.315	0.00045	-0.205	0.031
F2	coagulation factor II, thrombin	-0.296	0.0011	-0.267	0.0035
GPD1	glycerol-3-phosphate dehydrogenase 1	-0.296	0.0011	-0.311	0.012
GCKR	glucokinase regulator	-0.29	0.0014	-0.238	0.024
KRT24	keratin 24	-0.279	0.0021	-0.769	0.0045
HYAL1	hyaluronidase 1	-0.273	0.0028	-0.227	0.017
AQP7	aquaporin 7	-0.272	0.0029	-0.246	0.023
DUOX2	dual oxidase 2	-0.262	0.0042	-0.657	0.0005
CPN1	carboxypeptidase N subunit 1	-0.247	0.0073	-0.269	0.0066
SERPINA4	serpin family A member 4	-0.245	0.0079	-0.2	0.046
AMBP	alpha-1-microglobulin/bikunin precursor	-0.244	0.0082	-0.297	0.014
ABCC2	ATP binding cassette subfamily C member 2	-0.242	0.0085	-0.24	0.0014
USH1C	USH1 protein network component harmonin	-0.24	0.0093	-0.24	0.0049
CACNA1I	calcium voltage-gated channel subunit alpha1 I	-0.237	0.01	-0.408	0.011
TNNT3	troponin T3, fast skeletal type	-0.234	0.011	-0.316	0.025
PRODH2	proline dehydrogenase 2	-0.231	0.012	-0.185	0.0047
GLP2R	glucagon like peptide 2 receptor	-0.227	0.014	-0.364	0.036
SERPINA6	serpin family A member 6	-0.221	0.017	-0.217	0.016
LIPE	lipase E, hormone sensitive type	-0.219	0.018	-0.299	0.03
CCNH	cyclin H	-0.215	0.02	-0.189	0.026
ALAS2	5'-aminolevulinate synthase 2	-0.209	0.025	-0.228	0.014
PGLYRP1	peptidoglycan recognition protein 1	-0.208	0.025	-0.426	0.006
SERPINF2	serpin family F member 2	-0.208	0.026	-0.308	0.039
VAT1	vesicle amine transport 1	-0.206	0.027	-0.188	0.046
TBP	TATA-box binding protein	-0.205	0.028	-0.269	0.0082
GJA3	gap junction protein alpha 3	-0.203	0.029	-0.275	0.029
FGB	fibrinogen beta chain	-0.202	0.03	-0.201	0.018
PAX7	paired box 7	-0.2	0.032	-0.332	0.018
CIDEA	cell death inducing DFFA like effector a	-0.199	0.032	-0.719	0.016
DUSP13	dual specificity phosphatase 13	-0.193	0.038	-0.204	0.0038
INSL3	insulin like 3	-0.188	0.044	-0.439	0.018
PF4V1	platelet factor 4 variant 1	-0.188	0.044	-0.806	0.032
NHLH1	nescient helix-loop-helix 1	-0.187	0.045	-0.377	0.033
PIK3R5	phosphoinositide-3-kinase regulatory subunit 5	-0.185	0.048	-0.446	0.0048
RND1	Rho family GTPase 1	-0.184	0.049	-0.283	0.00035
RAB5C	RAB5C, member RAS oncogene family	-0.183	0.05	-0.22	0.032
PUF60	poly(U) binding splicing factor 60	0.185	0.047	0.164	0.037
RALBP1	ralA binding protein 1	0.187	0.046	0.21	0.011
UBE3C	ubiquitin protein ligase E3C	0.188	0.044	0.15	0.037
VTCN1	V-set domain containing T cell activation inhibitor 1	0.192	0.04	0.055	0.046
CASP2	caspase 2	0.199	0.033	0.369	0.0019
KRIT1	KRIT1 ankyrin repeat containing	0.199	0.032	0.309	0.0049
ZNF16	zinc finger protein 16	0.2	0.032	0.164	0.042
PDE3A	phosphodiesterase 3A	0.207	0.026	0.131	0.029
PTPRF	protein tyrosine phosphatase receptor type F	0.208	0.025	0.193	0.031
NXT2	nuclear transport factor 2 like export factor 2	0.21	0.024	0.151	0.0081
RNF38	ring finger protein 38	0.211	0.023	0.183	0.034
TMPRSS3	transmembrane serine protease 3	0.212	0.023	0.097	0.036
PPP1R9A	protein phosphatase 1 regulatory subunit 9A	0.214	0.021	0.175	0.017
LUC7L2	LUC7 like 2, pre-mRNA splicing factor	0.219	0.018	0.325	0.0038
MKRN1	makorin ring finger protein 1	0.22	0.018	0.277	0.011
SLC1A3	solute carrier family 1 member 3	0.222	0.016	0.105	0.035
MSH6	mutS homolog 6	0.223	0.016	0.276	0.0043
VANGL1	VANGL planar cell polarity protein 1	0.231	0.013	0.223	0.0033
SLC27A6	solute carrier family 27 member 6	0.233	0.011	0.141	0.0009
FGFR2	fibroblast growth factor receptor 2	0.254	0.006	0.162	0.036
CUL1	cullin 1	0.255	0.005	0.205	0.036
SSPN	sarcospan	0.265	0.004	0.116	0.022
PAXIP1	PAX interacting protein 1	0.266	0.004	0.218	0.014
SLC5A1	solute carrier family 5 member 1	0.267	0.004	0.076	0.046
TNPO3	transportin 3	0.281	0.002	0.153	0.031
Genes subject to real-time PCR were indicated in red.
